1 **Mutually suppressive roles of KMT2A and KDM5C in behaviour, neuronal**  
2 **structure, and histone H3K4 methylation**

3

4 Christina N. Vallianatos<sup>1, 2</sup>, Brynne Raines<sup>3</sup>, Robert S. Porter<sup>1,2</sup>, Katherine M.  
5 Bonefas<sup>1,4</sup>, Michael C. Wu<sup>5</sup>, Patricia M. Garay<sup>1,4</sup>, Katie M. Collette<sup>3</sup>, Young Ah Seo<sup>6</sup>,  
6 Yali Dou<sup>7</sup>, Catherine E. Keegan<sup>1,8</sup>, Natalie C. Tronson<sup>3,\*</sup>, and Shigeki Iwase<sup>1,\*</sup>

7

8 <sup>1</sup>Department of Human Genetics, Michigan Medicine, University of Michigan, Ann Arbor,  
9 MI 48109

10 <sup>2</sup>Genetics and Genomics Graduate Program, University of Michigan, Ann Arbor, MI  
11 48109

12 <sup>3</sup>Department of Psychology, College of LS&A, University of Michigan, Ann Arbor, MI  
13 48109

14 <sup>4</sup>The University of Michigan Neuroscience Graduate Program

15 <sup>5</sup>Neurodigitech, LLC, San Diego, CA

16 <sup>6</sup>Department of Nutritional Sciences, School of Public Health, University of Michigan,  
17 Ann Arbor, MI 48109

18 <sup>7</sup>Department of Pathology, Michigan Medicine, University of Michigan, Ann Arbor, MI  
19 48109

20 <sup>8</sup>Department of Pediatrics, Michigan Medicine, University of Michigan, Ann Arbor, MI  
21 48109

22 \*Co-corresponding authors

23 Please address correspondence to: [siwase@umich.edu](mailto:siwase@umich.edu) and [ntronson@umich.edu](mailto:ntronson@umich.edu)

24 **Abstract**

25 Histone H3 lysine 4 methylation (H3K4me) is extensively regulated by numerous writer  
26 and eraser enzymes in mammals. Nine H3K4me enzymes are associated with  
27 neurodevelopmental disorders to date, indicating their important roles in the brain.  
28 However, interplay among H3K4me enzymes during brain development remains largely  
29 unknown. Here, we show functional interactions of a writer-eraser duo, *KMT2A* and  
30 *KDM5C*, which are responsible for Wiedemann-Steiner Syndrome (WDSTS), and  
31 mental retardation X-linked syndromic Claes-Jensen type (MRXSCJ), respectively.  
32 Despite opposite enzymatic activities, the two mouse models deficient for either *Kmt2a*  
33 or *Kdm5c* shared reduced dendritic spines and increased aggression. Double mutation  
34 of *Kmt2a* and *Kdm5c* clearly reversed dendritic morphology, key behavioral traits  
35 including aggression, and partially corrected altered transcriptomes and H3K4me  
36 landscapes. Thus, our study uncovers common yet mutually suppressive aspects of the  
37 WDSTS and MRXSCJ models and provides a proof of principle for balancing a single  
38 writer-eraser pair to ameliorate their associated disorders.

## 39 **Introduction**

40 Dysregulation of histone methylation has emerged as a major contributor to  
41 neurodevelopmental disorders (NDDs) such as autism spectrum disorders and  
42 intellectual disabilities (1). Histone methylation can be placed on a subset of lysines and  
43 arginines by histone methyltransferases (writer enzymes) and serves as a signaling  
44 platform for a variety of nuclear events including transcription (2). Reader proteins  
45 specifically recognize methylated histones, thereby converting methylation signals into  
46 higher-order chromatin structures. Histone methylation can be removed by a set of  
47 histone demethylases (eraser enzymes). Pathogenic variants in all three classes of  
48 methyl-histone regulators cause NDDs, indicating critical, yet poorly understood roles of  
49 histone methylation dynamics in brain development and function (3).

50  
51 Histone H3 lysine 4 methylation (H3K4me) is one of the most well-characterized histone  
52 modifications. H3K4me is primarily found at transcriptionally active areas of the  
53 genome. The three states, mono-, di-, and tri-methylation (H3K4me<sub>1-3</sub>), uniquely mark  
54 gene regulatory elements and play pivotal roles in distinct steps of transcription. While  
55 H3K4me<sub>3/2</sub> are enriched at transcriptionally engaged promoters, H3K4me<sub>1</sub> is a  
56 hallmark of transcriptional enhancers (4, 5). At promoters, H3K4me<sub>3</sub> contributes to  
57 recruitment of general transcription machinery TFIID and RNA polymerase II (6, 7).  
58 H3K4me<sub>1</sub> at enhancers can be recognized by BAF, an ATP-dependent chromatin  
59 remodeling complex (8).

60

61 H3K4me is extensively regulated by more than seven methyltransferases and six  
62 demethylases in mammals (9). Consistent with the important roles of H3K4me in  
63 transcriptional regulation, genomic distribution of H3K4me appears highly dynamic  
64 during brain development (10). However, the contributions of each of the 13 enzymes in  
65 the dynamic H3K4me landscapes of the developing brain remain largely unknown.  
66 Strikingly, genetic alterations in nine H3K4me enzymes and at least two H3K4me  
67 readers have been associated with human NDDs to date, indicating the critical roles of  
68 H3K4me balance (10) (Figure 1A). These human conditions can be collectively referred  
69 to as brain H3K4 methylopathies and point to non-redundant yet poorly understood  
70 roles of these genes controlling this single post-translational modification for faithful  
71 brain development. Of note, some of these enzymes can have non-enzymatic  
72 scaffolding function (11) as well as non-histone substrate (12); therefore, these  
73 disorders may potentially involve mechanism outside histone H3K4 methylation.

74  
75 As histone modifications are reversible, one can, in theory, correct an imbalance by  
76 modulating the writers or erasers. Chemical inhibitors of histone deacetylases (HDACs)  
77 have been successfully used to rescue phenotypes in mouse models of NDDs. HDAC  
78 inhibitors were able to ameliorate learning disabilities in mouse models of Rubinstein-  
79 Taybi and Kabuki syndromes, which are deficient for CREBBP or KMT2D, writer  
80 enzymes for histone acetylation or H3K4me, respectively (13, 14). However, the HDAC  
81 inhibitors, such as SAHA and AR-42, used in these studies interfere with multiple  
82 HDACs (15), which could potentially result in widespread side effects. Given the non-  
83 redundant roles of the H3K4me enzymes, a more specific perturbation is desirable.

84

85 In order to achieve specific modulation of H3K4me, an important first step is to delineate  
86 functional relationships between the H3K4 enzymes. Focus of the work is on a pair of  
87 NDD-associated writer/eraser enzymes: KMT2A and KDM5C. Haploinsufficiency of  
88 *KMT2A* underlies Weidemann-Steiner Syndrome (WDSTS), characterized by  
89 developmental delay, intellectual disability, characteristic facial features, short stature,  
90 and hypotonia (16). Loss of KDM5C function defines Mental Retardation, X-linked,  
91 syndromic, Claes Jensen type (MRXSCJ), in which individuals display an intellectual  
92 disability syndrome with aggression, short stature, and occasional autism comorbidity  
93 (17). Mouse models have provided experimental support for causative impacts of  
94 KMT2A and KDM5C deficiencies in impaired cognitive development (18-22). Social  
95 behavior and neuronal structure in *Kmt2a*-KO mice however have not been  
96 characterized.

97

98 In the present work, we tested whether modulating a single H3K4me writer or eraser  
99 can ameliorate the neurodevelopmental symptoms observed in the WDSTS and  
100 MRXSCJ mouse models. We generated *Kmt2a*-, *Kdm5c*-double mutant (DM) mice, and  
101 performed systematic comparisons between wild-type (WT), single mutants, and DM  
102 mice.

## 103 **Results**

104

### 105 **KMT2A and KDM5C co-exist broadly in the brain**

106 We first examined expression patterns of KMT2A and KDM5C using publicly available  
107 resources, and found the two genes are broadly expressed throughout brain regions of  
108 adult mice and humans (Supplementary Figure 1). *Kmt2a* and *Kdm5c* are expressed at  
109 comparable levels in all major excitatory and inhibitory neuron subtypes as well as glia  
110 cells in mouse visual cortices (Supplementary Figure 1A), and also throughout mouse  
111 brains (Supplementary Figure 1B). Consistently, developing and aging human brains  
112 express *KMT2A* and *KDM5C* at high, steady levels (Supplementary Figure 1C). Thus,  
113 both writer and eraser are co-expressed across brain cell types, regions, and  
114 developmental stages in both humans and mice.

115

### 116 **Generation of *Kmt2a-Kdm5c* double-mutant (DM) mice**

117 To test genetic interaction of *Kmt2a* and *Kdm5c*, we generated *Kmt2a-Kdm5c* double-  
118 mutant (DM) mice. Experimental mice were F1 hybrids of the two fully congenic strains:  
119 129S1/SvlmJ *Kmt2a*<sup>+/-</sup> males (23) and C57BL/6J *Kdm5c*<sup>+/-</sup> females (21) (Figure 1B).  
120 This cross resulted in the following genotypes of male mice in an identical genetic  
121 background: wildtype (WT); *Kmt2a* heterozygote (*Kmt2a*-HET: *Kmt2a*<sup>+/-</sup>), *Kdm5c*  
122 hemizygous knock-out (*Kdm5c*-KO: *Kdm5c*<sup>-/y</sup>), and *Kmt2a-Kdm5c* double-mutant (DM:  
123 *Kmt2a*<sup>+/-</sup>, *Kdm5c*<sup>-/y</sup>), thereby allowing us to perform a comparison between the WDSTS  
124 model (*Kmt2a*-HET), the MRXSCJ model (*Kdm5c*-KO), and their composite (DM). We

125 focus on males, because MRXSCJ predominantly affects males and *Kdm5c*-  
126 heterozygous female mice exhibit only minor cognitive deficits (22).  
127  
128 These mice were born at expected Mendelian ratios of 25% per genotype,  
129 demonstrating the DM mice were not synthetic lethal (Figure 1C). Genotypes were  
130 confirmed at RNA and DNA levels (Supplementary Figure 1A-C), and protein level for  
131 KDM5C (Supplementary Figure 1D). Brain anatomy showed no gross deformities in any  
132 of the genotypes (Supplementary Figure 1E). Both *Kmt2a*-Het and *Kdm5c*-KO mice  
133 showed significant body weight reduction compared to WT (Figure 1D and  
134 Supplementary Figure 1F, One Way ANOVA:  $F(3, 55) = 10.28$ ,  $p < 1.0 \times 10^{-4}$ , Tukey's  
135 multiple comparison test: WT vs 2A:  $p = 0.008$ , WT vs 5C:  $p = 0.008$ ). DM body weight  
136 was significantly smaller compared to WT (DM vs WT:  $p < 1.0 \times 10^{-4}$ ). Thus, loss of  
137 *Kdm5c* and *Kmt2a* heterozygosity both led to growth retardation, which was not  
138 corrected but rather slightly exacerbated in DM mice. Note that for all the four-way  
139 comparisons in this study, we first represent the  $p$ -values from one-way ANOVA tests of  
140 genotype-phenotype interaction with histograms. We then report  $p$ -values from post-hoc  
141 tests of all six genotype comparisons with 95% confidence intervals of group mean  
142 differences.

143

#### 144 **Memory impairments in *Kdm5c*-KO were ameliorated in DM**

145 We first sought to determine the effect of loss of *Kmt2a* and/or *Kdm5c* on mouse  
146 behavior through a battery of behavioral tests. Learning and memory was measured by  
147 two independent tests, contextual fear conditioning (CFC) and novel object recognition

148 (NOR). In CFC, we observed a significant effect of genotype (CFC:  $F(3,60) = 4.133$ ,  $p =$   
149  $0.010$ ). In accordance with previous findings (21, 22), *Kdm5c*-KO showed significant  
150 deficits in associative fear memory in CFC (Figure 2A, WT vs 5C:  $p = 0.017$ , 2A vs 5C:  
151  $p = 0.0024$ ). Previous work reported that homozygous deletion of *Kmt2a* in excitatory  
152 hippocampal neurons leads to impaired fear memory in the CFC (20). In contrast,  
153 *Kmt2a*-HET mice showed no deficits in either CFC or NOR (Figure 2A-B) (CFC:  $p =$   
154  $1.000$ ), indicating that *Kmt2a*-heterozygosity does not lead to learning impairment  
155 measured in these assays. Importantly, DM mice did not differ from WT mice (Figure  
156 2A) ( $p = 0.923$ ), suggesting that *Kmt2a* heterozygosity rescues CFC memory deficits of  
157 *Kdm5c*-KO mice.

158  
159 A similar pattern emerged in NOR, where we observed a significant main effect of  
160 genotype ( $F(3,64) = 3.20$ ,  $p = 0.030$ ). Here, *Kdm5c*-KO mice showed significantly less  
161 preference for the novel object than other genotypes (Figure 2B) (WT vs 5C:  $p = 0.041$ ;  
162 2a vs 5C:  $p = 0.091$ ). Consistent with our CFC results, neither *Kmt2a*-HET mice nor DM  
163 mice differed from WT mice ( $p = 1.000$ ), suggesting that *Kmt2a* heterozygosity does not  
164 impair memory, but can rescue impairments of *Kdm5c*-KO. Importantly, WT, *Kmt2a*-Het,  
165 and DM mice showed preference for the novel object ( $Z = 2.029$ ;  $p = 0.041$ ).  
166 Nevertheless, as this was not a strong preference, it is likely that non-mnemonic effects,  
167 including anxiety processes, also contributed to avoidance-like behavior in *Kdm5c*-KO  
168 mice. Differences between genotypes in memory tasks were not attributable to  
169 locomotor activity or shock responsiveness, as none of these parameters showed  
170 significant differences among the genotypes (Figure 2C-D).



171

## 172 **Social behavior in the single and double mutants**

173 We next examined social behavior using the three independent behavioral paradigms.

174 First, social interaction was tested with the three-chambered preference test, with an

175 overall effect of genotype ( $F(3,60) = 3.726$ ,  $p = 0.016$ ). WT mice showed a robust

176 preference for the novel mouse over the toy mouse ( $Z = 2.97$ ,  $p = 0.003$ ). Consistent

177 with previous studies (21), *Kdm5c*-KO mice exhibited significantly less preference for

178 the stranger mouse compared with WT (WT vs 5C:  $p = 0.023$ ); whereas *Kmt2a*-HET

179 mice showed no differences from WT (Figure 3A, WT vs 2A:  $p = 0.563$ ) (20). Similar to

180 *Kdm5c*-KO, DM mice showed a strong trend towards less time with stranger mice

181 compared to WT (WT vs DM:  $p = 0.077$ ). No difference was detected between *Kdm5c*-

182 KO and DM (5C vs DM:  $p = 1.000$ ), indicating that *Kmt2a* heterozygosity does not alter

183 social preference or rescue the deficit of *Kdm5c*-KO.

184

185 In tests of social dominance (Figure 3B), both *Kmt2a*-HET and *Kdm5c*-KO mice won

186 more frequently against WTs (2A vs WT: 60.9%,  $p = 0.091$ , 5C vs WT: 68.4%,  $p =$

187 0.008). In contrast, DM animals lost more than 80% of their bouts against WT (DM vs

188 WT:  $p = 1.47 \times 10^{-5}$ ). Although DM mice were slightly smaller compared to single

189 mutants (Figure 1D), this is unlikely to drive submissive behaviors, as body mass has

190 been shown to have minimal impact on social hierarchy unless excess difference (>

191 30%) is present between animals (24), which is not the case in our study (Figure 1D)

192 (2A vs WT: 11%, 5C vs WT: 17%, DM vs WT: 25%). These results indicate that the two

193 single mutants share heightened social dominance and the double mutation reverses  
194 the social dominance.

195

196 Lastly, in the resident-intruder test, similar to other behavioral paradigms, overall effects  
197 of genotype were evident in both aggressive and submissive behavior (Figure 3C,  
198 aggressive behavior:  $F(3,60) = 3.642$ ,  $p = 0.018$ ; aggression x genotype:  $F(12,240) =$   
199  $1.853$ ,  $p = 0.041$ ; submissive behavior: ( $F(3,60) = 4.335$ ,  $p = 0.008$ ). The genotype  
200 effect on aggressive behaviors inversely correlated with that of submissive behavior,  
201 reinforcing the changes in specific behaviors rather than general locomotor activity.

202 Both *Kmt2a*-HET and *Kdm5c*-KO showed a trend of increased aggression and  
203 decreased submission when we combined frequency of all aggressive or submissive  
204 behavior types compared to WT (Figure 3C).

205

206 DM mice showed significantly reduced overall aggression compared to the two single  
207 mutants (Fig. 3C, DM vs 5C:  $p = 0.045$ , DM vs 2A:  $p = 0.051$ ). Reciprocally, DM mice  
208 were more submissive compared to single mutants (DM vs 5C:  $p = 0.006$ , DM vs 2A:  $p$   
209  $= 0.059$ ). Comparison between DM and WT mice did not yield any significant  
210 differences. The decreased aggression and increased submission of DM relative to the  
211 single mutants were also observed in multiple behavior types, including mounting,  
212 chasing for aggression (Supplementary Figure 3A), and cowering and running away for  
213 submission (Supplementary Figure 3B). Thus, these results suggest that double  
214 mutations alleviate aggressive behavior of both *Kmt2a*-HET and *Kdm5c*-KO mice.

215

216 Together, the behavioral studies revealed more pronounced deficits in *Kdm5c*-KO  
217 animals compared to *Kmt2a*-HET mice in terms of memory and social interaction, while  
218 *Kmt2a*-HET and *Kdm5c*-KO mice shared increased social dominance and aggression.  
219 The consequences of double mutations varied between the tests, with clear rescue  
220 effects on cognitive tasks, dominant behavior, and aggression, and no effect on social  
221 interactions. No behavioral traits were exacerbated in DM. Interestingly, DM mice  
222 showed opposite phenotypes in social dominance and aggression compared to single  
223 mutants, which is reminiscent of the increased spine density in the DM basolateral  
224 amygdala but not in the hippocampal CA1 (Figure 4). These results establish common  
225 and unique behavioral deficits of *Kdm5c*-KO and *Kmt2a*-HET mice and mutual  
226 suppression between the two genes in some of the traits.

227

### 228 **Roles of KMT2A, KDM5C, and their interplay in neuronal morphology**

229 Altered dendrite morphology is a hallmark of many human NDDs, as well as animal  
230 models of NDDs (25). We previously found reduced dendritic length and spine density  
231 in basolateral amygdala (BLA) neurons of *Kdm5c*-KO adult male mice (21). Assessment  
232 of dendritic morphology in *Kmt2a*-HET has not been reported. We first performed  
233 comparative dendrite morphometry of pyramidal neurons in the BLA using Golgi  
234 staining for the four genotypes (Figure 4). For *Kdm5c*-KO neurons, we recapitulated our  
235 previous findings of reduced dendrite lengths (Figure 4A and B, one-way ANOVA  
236 followed by Tukey's multiple comparison test, WT vs 5C:  $p = 0.034$ ) and lower spine  
237 density (Figure 4A and C, WT vs 5C:  $p = 0.008$ ). Similar to *Kdm5c*-KO neurons, *Kmt2a*-

238 HET cells exhibited a reduction in spine density (Figure 4B and C, WT vs 2A:  $p = 0.005$ )  
239 but not in dendritic length (WT vs 2A:  $p = 0.177$ ).

240

241 Dendrite lengths of DM did not differ significantly from WT (Figure 4B, WT vs. DM:  $p =$   
242  $0.550$ ); however, these lengths were also not different from *Kdm5c*-KO (*Kdm5c*-KO vs.  
243 DM:  $p = 0.534$ ), representing a weak restorative effect. In contrast, dendritic spine  
244 density of DM showed a significant increase that surpassed a rescue effect (Figure 4C).  
245 As morphology of dendritic spines progressively changes during synaptogenesis and  
246 development, we also asked whether developmental subtypes of dendritic spines were  
247 altered in any genotype. We did not find dramatic changes in spine morphology among  
248 the four genotypes (Figure 4D, Supplementary Figure 4), indicating selective  
249 requirement of *Kdm5c* and *Kmt2a* for regulation of spine numbers.

250

251 Since the ventral hippocampus CA1 (vCA1) receives inputs from BLA (26), we also  
252 performed morphometry analyses of pyramidal neurons in this region. Genotype had  
253 significant impact on dendritic spine density (one-way ANOVA,  $F(3, 92) = 11.51$ ,  $p < 1.0 \times$   
254  $10^{-4}$ ) but not on dendritic length ( $F(3, 92) = 0.564$ ,  $p = 0.639$ ). While dendritic length did  
255 not show any difference in *Kdm5c*-KO and *Kmt2a*-HET neurons, spine density was  
256 decreased in the two single mutants compared to WT (WT vs 2A:  $p = 2.0 \times 10^{-4}$ , WT vs  
257 5C:  $p < 1.0 \times 10^{-4}$ ).

258

259 In DM vCA1, spine density showed a trend of decrease compared to WT, yet this did  
260 not reach statistical significance (WT vs DM:  $p = 0.066$ ). DM spine density was

261 significantly higher than *Kdm5c*-KO (DM vs 5C:  $p = 0.021$ ) but similar to *Kmt2a*-HET  
262 (DM vs 2A:  $p=0.223$ ). These analyses indicate reduced spine density in both *Kdm5c*-KO  
263 and *Kmt2a*-HET vCA1 neurons and its partial correction in DM.

264

265 Overall, we conclude that *Kmt2a*-HET and *Kdm5c*-KO share a reduced spine density in  
266 both BLA and vCA1. Double mutations led to reversal of spine phenotype in BLA and  
267 partial restoration in vCA1, supporting mutually suppressive roles of KMT2A and  
268 KDM5C in dendritic spine development.

269

## 270 **Roles of KMT2A and KDM5C in mRNA expression**

271 *Kdm5c*-KO mice exhibit aberrant gene expression patterns in the amygdala and frontal  
272 cortex (21), and hippocampus (22). Excitatory-neuron specific conditional *Kmt2a*-KO  
273 mice were also characterized with altered transcriptomes in the hippocampus and  
274 cortex (19, 20). However, the global gene expression of *Kmt2a*-HET, which is akin to  
275 the WDSTS syndrome genotypes, has not been determined. To compare the impact of  
276 *Kmt2a*-heterozygosity and *Kdm5c*-KO on the transcriptomes, we performed mRNA-seq  
277 using the amygdala and the hippocampus of adult mice with four animals per genotype.  
278 We confirmed the lack or reduction of reads from *Kdm5c* exons 11 and 12 and *Kmt2a*  
279 exons 8 and 9 (Supplementary Figure 2A-B). The accurate microdissection of brain  
280 regions was confirmed by co-clustering of our data with another published mRNA-seq  
281 (27) (Supplementary Figure 5A). Principal component analysis (PCA) indicated that  
282 transcriptomic divergence was primarily driven by brain regions rather than genotypes  
283 (Supplementary Figure 6A)

284

285 In the amygdala, we identified 132 differentially expressed genes (DEGs) in *Kdm5c*-KO  
286 (5C-DEGs) and no 2A-DEG ( $padj < 0.1$ ,  $n = 4$ , Figure 5A and Supplementary Figure 6).

287 The hippocampus yielded a consistently higher number of DEGs across the mutant  
288 genotypes (344 5C-DEGs and 4 2A-DEGs). The small number of 2A-DEGs is likely due  
289 to the one remaining copy of *Kmt2a*. Given increased social dominance (Figure 3B) and  
290 clear reduction of dendritic spines (Figure 4) in *Kmt2a*-HET mice, we reasoned that  
291 such phenotypes might be associated with mild gene misregulation, which was not  
292 detected by DEseq2. To be able to analyze the gene expression in *Kmt2a*-HET, we set  
293 a relaxed cut off ( $p < 0.005$ ) and retrieved 78 and 139 genes as 2A-DEG from the  
294 amygdala and hippocampus, respectively (Figure 5B and Supplementary Figure 6). We  
295 found an overall similarity in gene misregulation between the two brain regions for both  
296 *Kdm5c*-KO and *Kmt2a*-HET (Supplementary Figure 7A-B). Table S1 lists all DEGs  
297 found in the study.

298

299

300 We next compared the gene expression profiles between the single mutants. The  
301 majority of 5C-DEGs were upregulated and 2A-DEGs were downregulated (Figure 5A  
302 and 5B, Supplementary Figure 6). This result agrees with KMT2A's primary role as a  
303 transcriptional coactivator and KDM5C's suppressive activity on transcription by  
304 removing this mark, yet KDM5C can also act as a positive regulator of transcription (28).  
305 If KMT2A and KDM5C counteract, DEGs would be oppositely misregulated between the  
306 single mutants. Indeed, we found that 28-29% of 5C-DEGs and 8-17% of 2A-DEGs

307 show signs of opposite regulation in the other single mutant (Supplementary Figure 8A-  
308 B). Substantial fractions of DEGs were misregulated in the same directions  
309 (Supplementary Figure 8A-B), which might be due to indirect consequences of gene  
310 manipulations and altered circuits.

311

### 312 **Impact of double mutations on mRNA expression**

313 If the double mutations fully restore the normal transcriptome, the DM transcriptome  
314 should resemble to that of WT over single mutants. However, the DM brain tissues had  
315 a similar number of DEGs as *Kdm5c*-KO (Figure 5A). Many DM-DEGs overlap with 5C-  
316 DEGs (84 in the amygdala and in the hippocampus), and 41 DM-DEGs overlap with 2A-  
317 DEGs in the hippocampus (Supplementary Figure 8C). Thus, the DM transcriptome still  
318 retains some mRNA misregulations of single mutants and does not fully return to the  
319 normal state.

320

321 To assess the rescue effect more quantitatively, we compared fold changes of single-  
322 mutant DEGs as a group between genotypes. Expression of 5C-up-regulated genes  
323 was significantly lower in the DM amygdala and hippocampus (Paired Wilcoxon signed-  
324 rank test,  $p < 1.41 \times 10^{-8}$ , Figure 5C). Reciprocally, expression of 2A-down-regulated  
325 genes was significantly higher in DM brain tissues ( $p < 1.26 \times 10^{-8}$ , Figure 5C). We  
326 further examined how individual DEGs behaved in DM. The fold changes of 5C-DEGs  
327 and 2A-DEGs in single mutants clearly correlated with those in DM, indicating that  
328 single-mutant DEGs are similarly dysregulated in DM in general. However, the slopes of  
329 linear regression were lower than 1 with statistical significance, suggesting the partial

330 rescue effect (Figure 5D). The mildest rescue effect was observed in 5C-DEGs in the  
331 DM amygdala (linear regression slope=0.91±0.03), while 5C-DEGs in the hippocampus  
332 and 2A-DEGs-R exhibit more pronounced rescue effects (slope: 0.51~0.73). These  
333 results indicate that misregulation of genes in both *Kdm5c*-KO or *Kmt2a*-HET was  
334 partially corrected in the DM brain tissues.

335

336 We then sought to isolate genes that might have contributed to the rescue effects at  
337 cellular and behavioral levels. As shown by the red circles in Figure 5D, some DEGs  
338 exhibit stronger rescue effects than others. We selected these genes as potential  
339 drivers of rescue effects (see Materials & Methods). While 10 genes in the amygdala  
340 and 81 genes in the hippocampus drove rescue effects of 5C-DEGs, 36 genes in the  
341 amygdala and 46 genes in the hippocampus contributed to the partial restoration of  
342 normal 2A-DEGs expression in DM (Supplementary Data 2). We then performed  
343 pathway analysis on these rescue-driving genes using the Enrichr program. While 2A-  
344 rescue genes did not yield any statistically significant enrichment ( $p_{adj} < 0.05$ ), 5C-  
345 rescued genes showed an enrichment of a mouse KEGG pathway, “neuroactive ligand-  
346 receptor interaction” ( $p_{adj} = 5.60 \times 10^{-3}$ , Odds ratio: 6.01). The following 10 genes  
347 contributed to the enrichment: *Pomc*, *Adcy2*, *Agt*, *Adora2a*, *Mc3r*, *Gabre*, *P2ry14*,  
348 *Tacr1*, *Trh*, and *Lhb*. Except for *P2ry14*, all these genes have known roles in learning  
349 and memory or aggression (Table 1). Many of these genes were expressed at low  
350 levels in the WT and were derepressed following the KDM5C loss (Supplementary Data  
351 2), suggesting roles for KDM5C in suppressing aberrant gene expression.

352



353 Interestingly, most of these genes encode peptide hormones, their receptors, or  
354 downstream signaling molecules. For example, Pro-opiomelanocortin (POMC) is a  
355 peptide hormone primarily known for its roles in regulating hypothalamic functions, such  
356 as feeding (29). In addition to its high expression in the hypothalamus, *Pomc* is also  
357 expressed in the amygdala and the hippocampus (30). POMC signaling in these regions  
358 has been implicated in the cognitive decline of Alzheimer's disease (31). Another gene  
359 in the list, *Mc3r*, encodes a POMC receptor. *Mc3r* is expressed in the hypothalamus and  
360 limbic structures such as the amygdala and hippocampus (32). Similar to *Pomc*, *Mc3r*'s  
361 roles have been primarily studied in the hypothalamus, yet this gene has also been  
362 implicated in hippocampal memory consolidation (33). Collectively, these results raise  
363 the possibility that aberrant peptide hormone signaling and its normalization underlie  
364 phenotypic outcomes of *Kdm5c*-KO and DM mice.

365

### 366 **H3K4me3 landscapes in WDSTS and MRXSCJ models**

367 We sought to determine the impact of KMT2A- and KDM5C-deficiencies and double  
368 mutation on the H3K4me3 landscape within the amygdala. In Western blot analyses,  
369 global H3K4me1-3 levels were not altered dramatically in any mutant (Figure 6A,  
370 Supplementary Figure 9). We thus performed H3K4me3 chromatin immunoprecipitation  
371 coupled with deep sequencing (ChIP-seq) to probe local changes genome-wide. To  
372 assess the IP specificity, we spiked-in an array of recombinant nucleosomes carrying 15  
373 common methylations along with DNA barcodes appended to the Widom601  
374 nucleosome positioning sequence (34) (see Methods). The two recombinant H3K4me3  
375 nucleosomes dominated the Widom601-containing DNA in all IP reactions with

376 negligible signals from other methylation states such as H3K4me1 or H3K4me2  
377 (Supplementary Figure 10A), demonstrating a superb specificity of the ChIP.  
378  
379 PCA analyses of H3K4me3 distribution indicated that WT and *Kmt2a*-HET are close  
380 each other, while *Kdm5c*-KO and DM cluster separately from the WT-2a-HET cluster.  
381 Reminiscent of the transcriptome data (Figure 5), we did not recover any differentially  
382 methylated regions (DMRs) in *Kmt2a*-HET, while *Kdm5c*-KO had 1,147  
383 hypermethylated regions (Figure 6C, Supplementary Figure 9,  $p_{adj} < 0.05$ , see  
384 method). In *Kdm5c*-KO, 583 loci are hypomethylated compared to WT, and these  
385 regions are highly methylated regions in WT (Figure 6C and Supplementary Figure 10).  
386 By relaxing the threshold, we obtained weak 2A-HET DMRs (Figure 6C, 357  
387 hypermethylated and 240 hypomethylated). We then examined how these single-mutant  
388 DMRs behaved in the other single mutant. Compared to the transcriptome data  
389 (Supplementary Figure 8), we were able to recover more DMRs that are misregulated in  
390 opposite directions between the single mutants (Figure 6D). These results suggest that,  
391 as a primary substrate of the two enzymes, H3K4me3 changes represent the action of  
392 KMT2A and KDM5C more directly compared to mRNA expression. Comparable  
393 numbers of DMRs still show same-direction H3K4me3 changes, which may again  
394 reflect indirect consequences of gene manipulations.

395

### 396 **Rescue effect of H3K4me3 landscapes in DM**

397 We next examined the impact of double mutations on H3K4me3 distributions. Notably,  
398 in the PCA plot, the second replicate of DM showed a stronger rescued compare to

399 other replicates, indicating that expressivity of rescue effect varies among individual  
400 animals (Figure 6B). The number of DMRs in DM are smaller than those of single  
401 mutants, indicating a global rescue of aberrant H3K4me3 (Figure 6C). We then  
402 assessed how single-mutant DMRs behaved in DM. Note that, we focus on  
403 hypomethylated loci in *Kmt2a*-HET and hypermethylated loci in *Kdm5c*-KO (colored loci  
404 in Figure 6D) based on their enzymatic activities. The opposite-direction 2A-DMRs  
405 showed complete normalization in DM, while the same-direction 2A-DMRs were even  
406 more hypomethylated in DM (Figure 6E). Likewise, the opposite-direction 5C-DMRs  
407 showed more pronounced rescue effect in DM compared to same-direction 5C-DMRs  
408 (Figure 6E). This direction-dependent rescue effect persisted even when we omitted DM  
409 rep2 from the analysis (Supplementary Figure 11). These results strongly support the  
410 idea that KMT2A and KDM5C counteract to normalize H3K4me3 levels in specific  
411 genomic loci.

412  
413 Peak annotation revealed that rescued DMRs tend to be outside the promoters, such as  
414 distal intergenic regions, introns, and internal exons (Figure 6F). ChIP-seq tracks of  
415 exemplary loci are represented in Supplementary Figure 12. Finally, we tested whether  
416 the rescue effects in gene expression involve normalization of H3K4me3. We took all  
417 rescued 2A-DEGs and plotted DM vs 2A fold changes of H3K4me3 as a function of DM  
418 vs 2A mRNA changes (Figure 6G). Rescued 2A-DEGs mostly showed an increase in  
419 mRNA levels in DM (Q2 and Q4). When mRNA expression increases from 2A-HET to  
420 DM, H3K4me3 levels also increase, which results in the larger number of genes within  
421 the upper right quadrant of the plot (Q2, 47 genes,  $p < 1.0 \times 10^{-4}$ ,  $\chi^2$  test). Similarly,

422 when mRNA expression decreases from 5C-KO to DM, the majority of genes are  
423 accompanied by decreased H3K4me3 nearby (Q3: 45 genes vs Q1: 20 genes,  $p < 1.0 \times$   
424  $10^{-4}$ ,  $\chi^2$  test). Furthermore, the magnitude of mRNA and H3K4me3 changes show  
425 positive correlations (Pearson  $r = 0.16$ , and  $r = 0.27$  for 2A- and 5C-DEGs,  
426 respectively). Thus, misregulation of mRNA expression and its partial correction involve  
427 corresponding restoration of the H3K4me3 levels.

428

## 429 **Discussion**

430 The present work, to our knowledge, represents the first genetic interactions between  
431 mammalian methyl histone writer and eraser *in vivo*. Interplay of opposing chromatin-  
432 modifying enzymes has been characterized in several biological processes and species.  
433 For example, DNMT3A DNA methyltransferase and TET2 dioxygenase, which oppose  
434 over DNA CpG methylation, can both counteract and cooperate to regulate gene  
435 expression in hematopoietic stem cells (35). Set1 and Jhd2, the sole H3K4me writer-  
436 eraser pair in yeast, have been shown to co-regulate transcription (36). However, a  
437 fundamental question remained — is there any specific writer-eraser pairing in highly  
438 duplicated gene families for a single chromatin modification? Mishra et al. showed that  
439 KDM5A antagonizes KMT2A, KMT2B, and KMT2D to modulate the transient site-  
440 specific DNA copy number gains in immortalized human cells (37). Cao et al. found that  
441 failed differentiation of mouse embryonic stem cells due to *Kmt2d* deletion can be  
442 rescued by *Kdm1a* knockdown (38). These pioneering efforts identified functional  
443 interplay between the opposing enzymes *in vitro*; however, no *in vivo* study has been

444 reported. Thus, the present study substantially advances our understanding of how  
445 methyl-histone enzymes functionally interact.

446

447 Brain development is particularly relevant to the H3K4me dynamics, because a cohort  
448 of neurodevelopmental disorders has been genetically associated with impaired  
449 functions of these enzymes, as discussed earlier. Unlike previous studies using  
450 chemical approaches that block multiple chromatin regulators (13-15), we demonstrated  
451 that manipulation of a single enzyme, KMT2A or KDM5C, is sufficient to reverse many  
452 neurological traits in both of the two single-mutant models. This study motivates  
453 interrogations of human populations to test if damaging mutations in writer and eraser  
454 enzymes can coincide in unaffected individuals. Our work also opens a new avenue for  
455 future studies to delineate the full interplay between the H3K4me-regulatory enzymes.

456

457 Several challenges remain, especially in linking molecular functions of KMT2A and  
458 KDM5C to cellular and behavioral outcomes. First, we measured gene expression and  
459 H3K4me3 in adult brain tissues, a mixture of many neuron and glia types, which may  
460 mask potentially important molecular changes. Increasing spatiotemporal resolution of  
461 the molecular study is an important future direction. Second, histone modifying  
462 enzymes, including KDM5C, can exert non-enzymatic function (11, 39). Although it has  
463 not been reported, there might be a non-histone substrate for KMT2A and KDM5C, as  
464 shown in other histone modifying enzymes (12). Thus, our study does not rule out the  
465 impact of these non-canonical roles of the two enzymes. Finally, in a fly model of  
466 KMD5-intellectual disability (40, 41), impaired intestinal barrier and the altered microbiota

467 contribute to abnormal social behavior, pointing to a non-tissue-autonomous  
468 mechanism (42). Future studies are warranted to isolate the causal events for observed  
469 rescue effects. The first step would be to test the functional contribution of candidate  
470 genes, many of which encode peptide-hormone signaling factors (Table 1).

471  
472 Increased social dominance is a novel behavioral trait we observed in both WDSTS and  
473 MRXSCJ mouse models. The amygdala is well known to mediate social behaviors. For  
474 example, lesions of BLA result in decreased aggression-like behavior and increased  
475 social interactions, and changes in transcriptional regulation in BLA are observed after  
476 social interactions (43). The dorsal hippocampus CA1 is a direct recipient region of BLA  
477 inputs (26). Decreased BLA and CA1 spine densities in *Kmt2a*-HET and *Kdm5c*-KO  
478 mice inversely correlate with increased social dominance and aggression (Figures 3  
479 and 4). Together, these observations imply that decreased spine density is not a cause  
480 of increased social dominance, but rather reflects compensatory reduction of net  
481 synaptic strength due to increased excitation and/or a loss of inhibitory control in this  
482 circuit. Thus, determining the connectivity of the amygdala with other regions, including  
483 prelimbic, infralimbic, and orbitofrontal cortices as well as the ventral hippocampus, will  
484 be critical for understanding the changes in social behaviors in both WDSTS and  
485 MRXSCJ models.

486  
487 It is important to note that the double mutations introduced in our mice were constitutive,  
488 and therefore a lifetime of adaptation to loss of these two major chromatin regulators  
489 may occur from early developmental stages. A more realistic therapeutic strategy may

490 be acute inhibition of KDM5C and KMT2A in the juvenile or mature brain. Previous work  
491 characterizing mouse models with excitatory-neuron specific ablation of *Kdm5c* or  
492 *Kmt2a* via *CamKII*-Cre found that conditional *Kmt2a* deletion led to clear learning  
493 deficits (20), while cognitive impairments in the conditional *Kdm5c*-KO mice were much  
494 milder than those of constitutive *Kdm5c*-KO mice (22). These results suggest a  
495 developmental origin of phenotypes in *Kdm5c*-KO. Future investigations are needed to  
496 address whether the effects of acute inhibition of opposing enzymes in these mouse  
497 models can restore such neurodevelopmental deficits.

498

## 499 **Materials & methods**

### 500 *Statistics and Reproducibility*

501 The proposed study was conducted with varied numbers of individual animals  
502 depending on the experiments. Data acquisition and analysis were conducted blindly  
503 except for molecular measurements including Western blots and genomics analyses.  
504 We did not remove any particular data points for their acquisition or analyses. Statistical  
505 tests were chosen based on the distribution of the data. Details of statistics and  
506 sampling are outlined below in each section.

507

### 508 *Mouse*

509 The *Kdm5c*-KO allele was previously described and maintained in C57BL/6J congenic  
510 background (21). *Kmt2a*-HET mice were generated by crossing previously described  
511 *Kmt2a*-flox (exons 8 and 9) mice with B6.129-Gt(ROSA)26Sor<sup>tm1(cre/ERT2)Tyj</sup>/J-Cre mice  
512 (44). Our strategy was to use F1 hybrid for all studies as previously recommended as a

513 standard practice to eliminate deleterious homozygous mutations, which can result in  
514 abnormalities in the congenic lines, e.g. deafness in C57/BL6 (45). We backcrossed  
515 *Kmt2a*<sup>+/-</sup> mice onto the desired 129S1/SvImJ strain, by marker-assisted accelerated  
516 backcrossing through Charles River Labs. *Kmt2a*<sup>+/-</sup> mice were bred to the N4 generation  
517 at minimum, where mice were >99% congenic for 129S1/SvImJ. All experimental mice  
518 were generated as F1 generation hybrids from mating between 129S1/SvImJ *Kmt2a*<sup>+/-</sup>  
519 males and C57Bl/6 *Kdm5c*<sup>+/-</sup> females: WT males (*Kmt2a*<sup>+/+</sup>, *Kdm5c*<sup>+/-</sup>); *Kdm5c*-KO  
520 males (*Kmt2a*<sup>+/+</sup>, *Kdm5c*<sup>-/-</sup>); *Kmt2a*-HET males (*Kmt2a*<sup>+/-</sup>, *Kdm5c*<sup>+/-</sup>); and *Kdm5c-Kmt2a*-  
521 DM males (*Kmt2a*<sup>+/-</sup>, *Kdm5c*<sup>-/-</sup>). Genotypes were confirmed using the following primers:  
522 for *Kmt2a*, 5'-GCCAGTCAGTCCGAAAGTAC, 5'-AGGATGTTCAAAGTGCCTGC, 5'-  
523 GCTCTAGAACTAGTGGATCCC; for *Kdm5c*, 5'-  
524 CAGGTGGCTTACTGTGACATTGATG, 5'-TGGGTTTGAGGGATACTTTAGG, 5'-  
525 GGTTCTCAACACTCACATAGTG.

526 All mouse studies complied with the protocols (PRO00008568: Iwase and  
527 PRO00008807: Tronson) by the Institutional Animal Care & Use Committee (IACUC) of  
528 The University of Michigan.

529

### 530 *Western blot analysis*

531 Total proteins from adult brain tissues were subjected to Western blot analysis using in-  
532 house anti-KDM5C (21) and anti-GAPDH antibodies (G-9, Santa Cruz). For histone  
533 proteins, nuclei were enriched from the Dounce-homogenized brain tissues using Nuclei  
534 EZ prep Kit (Sigma, NUC-101). DNA were digested with micrococcal nuclease (MNase,  
535 NEB) for 10 minutes at room temperature, and total nuclear proteins were extracted by



536 boiling the samples with the SDS-PAGE sample buffer. The following antibodies were  
537 used for Western blot analyses: anti-H3K4me3 (Abcam, ab8580, 1:1000), anti-  
538 H3K4me2 (Thermo, #710796, 1:1000), anti-H3K4me1 (Abcam, ab8895, 1:1000), and  
539 anti-H3 C-terminus (Millipore, CS204377, 1:2000).

540

#### 541 *Brain histology*

542 Mice were subjected to transcardial perfusion according to standard procedures. Fixed  
543 brains were sliced on a freeze microtome, yielding 30  $\mu$ m sections that were then fixed,  
544 permeabilized, blocked, and stained with DAPI. Slides were imaged on an Olympus  
545 SZX16 microscope, with an Olympus U-HGLGPS fluorescence source and Q Imaging  
546 Retiga 6000 camera. Images were captured using Q-Capture Pro 7 software. Data were  
547 collected in a blind fashion, where samples were coded and genotypes only revealed  
548 after data collection was complete.

549

#### 550 *Behavioral paradigms*

551 Prior to behavioral testing, mice were acclimated to the animal colony room for one  
552 week single-housing in standard cages provided with a lab diet and water *ad libitum*. A  
553 12-hour light-dark cycle (7:00AM-7:00PM) was utilized with temperature and humidity  
554 maintained at 20  $\pm$ 2  $^{\circ}$ C and >30%, respectively. The University of Michigan Committee  
555 on the Use and Care of Animals approved all tests performed in this research. Five  
556 tests, listed in order of testing, were performed: Novel Object Recognition (five days),  
557 Context Fear Conditioning (two days), Three-Chambered Social Interaction (two days),  
558 Social Dominance Tube Test (three to four days), and Resident-Intruder (two to three

559 days). All testing was conducted in the morning by experimenters blind to genotype.  
560 The cleaning agent used in every test between each trial was 70% ethanol. Data were  
561 collected in a blind fashion, where mice were coded and genotypes were only revealed  
562 after testing was complete.

563

564 *Contextual Fear Conditioning:* Mice were placed into a distinct context with white walls  
565 (9  $\frac{3}{4}$  × 12  $\frac{3}{4}$  × 9  $\frac{3}{4}$  in) and a 36 steel rod grid floor (1/8 in diameter;  $\frac{1}{4}$  spaced apart)  
566 (Med-Associates, St. Albans, VT) and allowed to explore for three minutes, followed by  
567 a two-second 0.8 mA shock, after which mice were immediately returned to their home  
568 cages in the colony room. Twenty-four hours later, mice were returned to the context  
569 and freezing behavior was assessed with NIR camera (VID-CAM-MONO-2A) and  
570 VideoFreeze (MedAssociates, St Albans, VT). Freezing levels were compared between  
571 genotypes using a between-groups analysis (one-way ANCOVA) with genotype as the  
572 between-subjects factor, and “cohort” as the covariate, to reduce variability as a result  
573 of multiple cohorts. Planned comparisons between genotypes were conducted, with  
574 Bonferroni correction for multiple comparisons.

575

576 *Novel Object Recognition:* Mice were first habituated to testing arenas (40 x 30 x 32.5  
577 cm<sup>3</sup>) in three, 10-minute sessions over six consecutive days. Twenty-four hours later,  
578 mice were allowed to explore two identical objects (a jar or egg, counterbalanced across  
579 animals) for two, 10-minute trials spaced three hours apart. All animals were returned to  
580 the arena, tested 24 hours after the first training session, and presented with one  
581 training object (“familiar” object: jar or egg) and one “novel” object (egg or jar).

582 Exploration of the objects was defined as nose-point (sniffing) within 2 cm of the object.  
583 Behavior was automatically measured by Ethovision XT9 software using a Euresys  
584 Picolo U4H.264No/0 camera (Noldus, Cincinnati, OH). Preference was calculated as  
585 the time spent exploring novel object/total time exploring both objects. One-sample  
586 Wilcoxon signed-rank tests against 50% (no preference) was used to establish whether  
587 animals remembered the original objects.

588

589

590 *Three-Chambered Social Interaction:* Mice were placed into a three-chambered  
591 apparatus consisting of one central chamber (24 x 20 x 30 cm<sup>3</sup>) and two identical side  
592 chambers (24.5 x 20 x 30 cm<sup>3</sup>) each with a containment enclosure (8 cm diameter; 18  
593 cm height; grey stainless steel grid 3 mm diameter spaced 7.4 mm apart) and allowed  
594 to habituate for 10 minutes. Twenty-four hours later, mice were returned to the  
595 apparatus that now included a 2-3 month-old stranger male mouse (C57BL/6N) on one  
596 side of the box (“stranger”), and a toy mouse approximately the same size and color as  
597 the stranger mouse on the other (“toy”). Exploration of either the stranger or toy was  
598 defined as nose-point (sniffing) within 2 cm of the enclosure and used as a measure of  
599 social interaction. Behavior was automatically scored by Ethovision XT9 software as  
600 described above, and social preference was defined as time exploring stranger/total  
601 time spent exploring (stranger + toy). One-sample Wilcoxon signed-rank tests against  
602 50% (no preference) was used to establish whether animals remembered the original  
603 objects. Differences between genotypes were analyzed using an ANCOVA with cohort

604 as a covariate. Planned comparisons with Bonferroni correction for multiple  
605 comparisons were used to assess differences between genotypes.

606

607 *Social Dominance Tube Test:* Twenty-four hours prior to testing, mice were habituated  
608 to a plastic clear cylindrical tube (1.5 in diameter; 50 cm length) for 10 minutes. During  
609 the test, two mice of different genotypes were placed at opposite ends of the tube and  
610 allowed to walk to the middle. The match concluded when the one mouse (the dominant  
611 mouse) forced the other mouse (the submissive mouse) to retreat with all four paws  
612 outside of the tube (a “win” for the dominant mouse). Each mouse underwent a total of  
613 three matches against three different opponents for counterbalancing. Videos were  
614 recorded by Ethovision XT9 software as described above, and videos were manually  
615 scored by trained experimenters blind to genotype. The number of “wins” was reported  
616 as a percentage of total number of matches. Data were analyzed using an Exact  
617 Binomial Test with 0.5 as the probability of success (win or loss).

618

619 *Resident-Intruder Aggression:* Resident-intruder tests were used to assess aggression.  
620 Tests were performed on consecutive days, where the resident mouse was exposed to  
621 an unfamiliar intruder mouse for 15 minutes. A trial was terminated prematurely if blood  
622 was drawn, if an attack lasted continuously for 30 seconds, or if an intruder showed  
623 visible signs of injury after an attack. Resident mice were assessed for active  
624 aggression (darting, mounting, chasing/following, tail rattling, and boxing/parrying), as  
625 well as submissive behaviors (cowering, upright, running away). Intruder mice were  
626 assessed for passive defense (freezing, cowering, and digging). Behavior was recorded

627 and videos scored manually by experimenters blind to genotype. A repeated measures  
628 analysis, with cohort as a covariate, was used for each aggressive (genotype x  
629 aggression measures ANOVA) and submissive behavior (genotype x submissive) to  
630 analyze aggressive behaviors. Planned comparisons for genotype, with Bonferroni  
631 corrections for multiple comparisons were used to further analyze specific effects of  
632 genotype.

633

#### 634 *Neuronal Golgi staining and morphological analyses*

635 Brains from adult (2-8 months) mice were dissected and incubated in a modified Golgi-  
636 Cox solution for two weeks at room temperature. The remaining procedure of Golgi  
637 immersion, cryosectioning, staining and coverslipping was performed as described  
638 previously (21). Four animals were used for each genotype, and pyramidal neurons in  
639 the basolateral amygdala and dorsal hippocampus CA1 per animal were quantified:  
640 N=24 neurons for WT, *Kmt2a*-HET and *Kdm5c*-KO, and N=27 neurons for DM.  
641 Quantification was done using commercially available software, NeuroLucida (v10,  
642 Microbrightfield, VT), installed on a Dell PC workstation that controlled a Zeiss Axioplan  
643 microscope with a CCD camera (1600 x 1200 pixels) and with a motorized X, Y, and Z  
644 focus for high-resolution image acquisition (100X oil immersion) and quantifications.  
645 The morphological analyses included: dendritic lengths, spine counts, and spine  
646 subtype morphology. All sample genotypes were blinded to the analysts throughout the  
647 course of the analysis.

648

649 The criteria for selecting candidate neurons for analysis were based on: (1) visualization  
650 of a completely filled soma with no overlap of neighboring soma and completely filled  
651 dendrites, (2) the tapering of most distal dendrites; and (3) the visualization of the  
652 complete 3-D profile of dendritic trees using the 3-D display of the imaging software.

653

654 For quantitative analysis of spine subtypes (thin, stubby, mushroom, filopodia, and  
655 branched spines), only spines orthogonal to the dendritic shaft were included in this  
656 analysis, whereas spines protruding above or beneath the dendritic shaft were not  
657 sampled. This principle remained consistent throughout the course of analysis.

658

659 After completion, the digital profile of neuron morphology was extrapolated and  
660 transported to a multi-panel computer workstation, then quantitated using  
661 NeuroExplorer program (Microbrightfield, VT), followed by statistical analysis (one- and  
662 two-way ANOVAs,  $p < 0.05$ ).

663

#### 664 *RNA-seq*

665 Brains from adult (4.5 to 8 months) male mice were microdissected to obtain the  
666 amygdala and hippocampus from Bregma ~ 4.80 mm regions. N=4 animals were used  
667 per genotype. The ages of mice used for genomics study, RNA-seq and ChIP-seq, are  
668 summarized in Supplementary Data 3. Tissue was homogenized in Tri Reagent  
669 (Sigma). Samples were subjected to total RNA isolation, and RNA was purified using  
670 RNEasy Mini Kit (Qiagen). ERCC spike-in RNA was added at this stage, according to  
671 manufacturer's instructions (Life Technologies). Libraries were prepared using the

672 NEBNext® Ultra™ II Directional RNA Library Prep Kit with oligo-dT priming. Multiplexed  
673 libraries were pooled in approximately equimolar ratios and purified using Agencourt  
674 RNAClean XP beads (Beckman Coulter).

675

676 Libraries were sequenced on the Illumina Novaseq 6000 platform, with paired-end 150  
677 base pair reads (24-35 million reads/library), according to standard procedures. Reads  
678 were mapped to the mm10 mouse genome (Gencode) using STAR (v2.5.3a), where  
679 only uniquely mapped reads were used for downstream analyses. Duplicates were  
680 removed by STAR, and a counts file was generated using FeatureCounts (Subread  
681 v1.5.0). BAM files were converted to bigwigs using deeptools (v3.1.3). Differentially  
682 expressed (DE) genes were called using DESeq2 (v1.14.1). Data analyses were  
683 performed with RStudio (v1.0.136). Fold change heatmaps was created using gplots  
684 heatmap.2 function.

685

686 To validate the microdissection of hippocampus and amygdala, we compared our RNA-  
687 seq datasets with similar RNA-seq data from Arbeitman (27) datasets, which involved  
688 the cerebellum, cortex, hippocampus, and amygdala. Briefly, count data underwent  
689 variance stabilizing transformation via DEseq2 vst function and Euclidean distances of  
690 the transformed values were calculated by dist command and the heatmap was  
691 generated by the pheatmap function. Linear regression analysis was performed using  
692 the smtr v3.4-8 slope.test function with intercept = FALSE and robust=FALSE options.  
693 Rescue-driving genes were chosen as genes that satisfy two conditions using R, **1**) abs  
694 (log2FC (single mutant vs DM) > 2, **2**) abs (log2FC (DM vs WT) < 0.7.

695

696 *ChIP-seq*

697 Amygdala tissues were microdissected from adult (8-14.5 months) male mice. N=2  
698 animals were used for WT, and N=3 animals were used for *Kmt2a*-HET, *Kdm5c*-KO,  
699 and DM as biological replicates. Nuclei were isolated using a Nuclei EZ prep Kit (Sigma,  
700 NUC-101), and counted after Trypan blue staining. Approximately 20,000 nuclei for  
701 each replicate were subjected to MNase digestion as previously described (46). We  
702 essentially followed the native ChIP-seq protocol (46) with two modifications. One was  
703 to use a kit to generate sequencing libraries in one-tube reactions (NEB, E7103S).  
704 Another modification was to spike-in the panel of synthetic nucleosomes carrying major  
705 histone methylations (EpiCypher, SKU: 19-1001) (34). For ChIP, we used the rabbit  
706 monoclonal H3K4me3 antibody (Thermo, clone #RM340, 2  $\mu$ g).

707

708 Libraries were sequenced on the Illumina NextSeq 500 platform, with single-end 75  
709 base-pair sequencing, according to standard procedures. We obtained 20-59 million  
710 reads per sample. Reads were aligned to the mm10 mouse genome (Gencode) and a  
711 custom genome containing the sequences from our standardized, synthetic  
712 nucleosomes (EpiCypher) for normalization, using Bowtie allowing up to two  
713 mismatches. Only uniquely mapped reads were used for analysis. The range of  
714 uniquely mapped reads for input samples was 38-44 million reads. All IP replicates had  
715 a mean of 9.1 million uniquely mapped reads (range: 7.4-13.9 million). The enrichment  
716 of mapped synthetic spike-in nucleosomes compared to input was calculated and used  
717 as a normalization coefficient for read depth of each ChIP-seq replicate.



718  
719 Peaks were called using MACS2 software (v 2.1.0.20140616) using input BAM files for  
720 normalization, with filters for a q-value < 0.1 and a fold enrichment greater than 1.  
721 Common peak sets were obtained via DiffBind, and count tables for the common peaks  
722 were generated with the Bedtools multicov command. We removed “black-list” regions  
723 that often give aberrant signals. Resulting count tables were piped into DEseq2 to  
724 identify DMRs incorporating the synthetic nucleosome normalization into the read depth  
725 factor. We used ChIPseeker to annotate H3K4me3 peaks with genomic features  
726 including mm10 promoters (defined here as  $\pm 1$  kb from annotated transcription start site  
727 [TSS]). Normalized bam files were converted to bigwigs for visualization in the UCSC  
728 genome browser. Genes near peaks were identified by ChIPseeker. RNA-seq and  
729 ChIP-seq data were integrated using standard R commands and rescued amygdala  
730 DEGs were chosen as genes that meet two criteria, **1)**  $\text{abs}(\log_2\text{FC}(\text{single mutant vs}$   
731  $\text{DM})) > 1$ , **2)**  $\text{abs}(\log_2\text{FC}(\text{DM vs WT})) < 0.7$ . All scripts used in this study are available  
732 upon request.

733

### 734 **Data Availability**

735 The RNA-seq and ChIP-seq are available in NCBI’s Gene Expression Omnibus (47).  
736 Accession numbers are GSE127722 for RNA-seq, GSE127817 for ChIP-seq and  
737 GSE127818 for SuperSeries.

738

### 739 **Acknowledgements**

740 We thank Dr. Ken Kwan, Mandy Lam, and Own Funk for their assistance with the RNA-  
741 seq library preparation protocol and use of their microscope; Chris Gates for his  
742 assistance with RNA-seq analyses; and Clara Farrehi, Jordan Rich, and Demetri  
743 Tsirikis for their assistance with experiments for transcriptome analyses, global histone  
744 methylation Western blots, and brain histology, respectively. We also thank Drs. Sally  
745 Camper, Stephen Parker, Stephanie Bielas, and Michael-Chrisopher Keogh, as well as  
746 the members of the Iwase and Bielas labs, for helpful discussions and critical review of  
747 the data. This work was funded by an NIH National Research Service Award T32-  
748 GM07544 (University of Michigan Predoctoral Genetics Training Program) from the  
749 National Institute of General Medicine Sciences (to CNV), an NIH National Research  
750 Service Award T32-HD079342 (University of Michigan Predoctoral Career Training in  
751 the Reproductive Sciences Program) from the National Institute of Child Health and  
752 Human Development (NICHD) (to CNV), University of Michigan Rackham Predoctoral  
753 Research Grants (to CNV), a Michigan Institute for Clinical and Health Research  
754 fellowship (Translational Research Education Certificate, supported by UL1TR000433  
755 and UL1TR002240) (to CNV), a University of Michigan Rackham Predoctoral  
756 Fellowship award (to CNV), an Autism Science Foundation Predoctoral Fellowship  
757 award (to CNV), an NIH National Research Service Award. F31NS103377 from the  
758 National Institute of Neurological Disease & Stroke (NINDS) (to RSP), NIH NINDS  
759 Awards (R01NS089896 and R21NS104774) (to SI), Basil O'Connor Starter Scholar  
760 Research Awards from March of Dimes Foundation (to SI), and a Farrehi Family  
761 Foundation Grant (to SI).

762

763 **Conflict of interest**

764 MCW is CEO of Neurodigitech, LLC. The other authors declare no conflict of interest.

765

766 **Author contributions**

767 CNV, NCT, and SI conceived the study and designed the experiments. BR and KMC

768 performed the mouse behavioral tests under the guidance of NCT. MCW oversaw

769 dendritic morphometry analyses. CNV, KMB, PMG, and SI analyzed RNA-seq data.

770 YAS performed global H3K4me3 analyses. RSP and SI performed H3K4me3 ChIP-seq

771 and analyses. CNV performed the rest of experiments and analyses. YD and CEK

772 provided key experimental recourse and made important intellectual contributions. CNV,

773 MCW, RSP, CEK, NCT, and SI wrote and edited the manuscript.

774

775

776 **Figures and Legends**

777 **Figure 1. The H3K4 methylopathies and generation of the *Kmt2a-Kdm5c* double-**

778 **mutant (DM) mouse. (A)** Histone H3 lysine 4 (H3K4me) methyltransferases (writers)

779 and demethylases (erasers) depicted by their ability to place or remove H3K4me.

780 Reader proteins recognizing specific H3K4me substrates (arrows) are depicted below.

781 Genes are listed next to their associated neurodevelopmental disorder. KMT2A and

782 KDM5C are highlighted in purple and green, respectively. WDSTS: Weideman-Steiner

783 Syndrome; ID: intellectual disability; ASD: autism spectrum disorder, CPRF: cleft palate,

784 psychomotor retardation, and distinctive facial features; ARID: autosomal recessive ID;

785 MRXSCJ: mental retardation, X-linked, syndromic, Claes-Jensen type. **(B)** Mouse

786 breeding scheme crossing congenic 129S1/SvImJ *Kmt2a*-heterozygous males with

787 congenic C57/Bl6 *Kdm5c*-heterozygous females, resulting in F1 generation mice. Only

788 males were used in this study. **(C)** Numbers of male offspring across 30 litters, showing

789 Mendelian ratios of expected genotypes. **(D)** Left panel: Body weight of adult mice > 2

790 months of age (mean  $\pm$  SEM, \*\*\*\* $p < 0.0001$  in one-way ANOVA). Right panel:

791 Difference between group means of weight (mean  $\pm$  95% confidence intervals, \* $p < 0.05$ ,

792 \*\* $p < 0.01$ , \*\*\* $p < 0.001$ , \*\*\*\* $p < 0.0001$  in Tukey's multiple comparison test).

793

794 **Figure 2. Deficit of memory-related behavior in *Kdm5c*-KO and its rescue in DM.**

795 **(A)** Contextual fear conditioning test. Left panel: Freezing levels after shock on test day

796 (mean  $\pm$  SEM, \* $p < 0.05$ ). Right panel: Difference between group means of freezing

797 (mean  $\pm$  95% confidence intervals, \* $p < 0.05$ ). **(B)** Novel object recognition test. Left

798 panel: Preference for novel versus familiar object (mean  $\pm$  SEM, \* $p < 0.05$ ). Right panel:

799 Difference between group means of freeze response (mean  $\pm$  95% confidence intervals,  
800 \* $p < 0.05$ ). **(C)** Response to mild foot-shock (mean  $\pm$  95% confidence intervals, no  
801 statistical significance [n.s.]). **(D)** Locomotor activity (mean  $\pm$  95% confidence intervals,  
802 no statistical significance [n.s.]). N=21 WT, N=16 *Kmt2a*-HET, N=16 *Kdm5c*-KO, and  
803 N=12 DM animals were used for all studies.

804

805 **Figure 3. Differential impacts of double mutation in social behavior. (A)** Three  
806 chamber test for social interaction. Left panel: preference for stranger versus toy mouse  
807 (mean  $\pm$  SEM, \* $p < 0.05$ ). Right panel: Difference between group means of preference  
808 (mean  $\pm$  95% confidence intervals, \* $p < 0.05$ ). **(B)** Tube test for social dominance.  
809 Proportion of wins in matches of each mutant versus WT. Numbers on colored bars  
810 represent total number of wins for WT (grey, above) or each mutant (below) in every  
811 matchup. \*\* $p < 0.01$ , \*\*\* $p < 0.001$ , Exact binomial test. **(C)** Resident intruder test. Left  
812 panel: average number of all aggressive and submissive behaviors (mean  $\pm$  SEM, \* $p <$   
813 0.05, \*\* $p < 0.01$ ). Right panel: Difference between group means of aggressive and  
814 submissive behaviors (mean  $\pm$  95% confidence intervals, \* $p < 0.05$ , \*\* $p < 0.01$ ). N=21  
815 WT, N=16 *Kmt2a*-HET, N=16 *Kdm5c*-KO, and N=12 DM animals were used for all  
816 studies.

817

818 **Figure 4. Altered dendrite morphology of *Kdm5c*-KO and *Kmt2a*-HET was**  
819 **reversed in DM animals. (A)** Representative images of basolateral amygdala (BLA)  
820 pyramidal neurons across all genotypes, depicting overall neuron morphology including  
821 dendrite lengths and dendritic spines. Scale bars represent: 100 $\mu$ m (above, whole

822 neuron image), 10 $\mu$ m (below, spine image). **(B and C)** Left panel: Total dendrite lengths  
823 **(B)** or spine density **(C)** (mean  $\pm$  95% \* $p$ <0.05, \*\*\*\* $p$ <0.0001, one-way ANOVA). Right  
824 panel: Difference between group means (mean  $\pm$  95% confidence intervals, \* $p$ <0.05,  
825 \*\* $p$ <0.01, \*\*\* $p$ <0.001, \*\*\*\* $p$ <0.0001 in Tukey's multiple comparison test). **(D)**  
826 Quantification of spine morphology subtypes represented as percentage of total spines  
827 counted. **(E and F)** Morphometry of pyramidal neurons within the dorsal hippocampus  
828 CA1. At least 20 neurons from four animals per genotype were quantified for all panels.  
829

830 **Figure 5. The transcriptomes in the amygdala and hippocampus.** **(A)** Number of  
831 differentially expressed (DE) genes across genotypes were determined using a  
832 threshold of  $p_{adj}$ -value < 0.1. or relaxed cut-off of  $p$  < 0.005 for *Kmt2a*-HET in **(B)** (see  
833 also Table S1). We analyzed amygdala and hippocampal tissues from four animals for  
834 each genotype. **(C)** Behavior of single-mutant DEGs in DM. Log2 fold change of DEGs  
835 relative to WT were plotted across the three mutants. Boxplot features: box, interquartile  
836 range (IQR); bold line, median; gray dots, individual genes. Associated  $p$  values result  
837 from Wilcoxon signed-rank tests. **(D)** Identification of rescue-driving genes and  
838 regression analysis. Blue fitting lines and slopes result from linear regression of log2  
839 fold changes between the two genotypes. Gray shade: 95% confidence interval.  $P$ -  
840 values indicate probability of the null hypothesis that the fitting line does not differ from 1  
841 (48). Red circles: rescue-driving genes (see method).

842

843

844 **Figure 6. Altered H3K4me3 landscapes in the amygdala and rescue effect in DM.**  
845 **(A)** Western blot of whole brain lysates showing unchanged global H3K4 methylation  
846 across genotypes. Total histone H3 was detected using an antibody recognizing the C-  
847 terminus of H3, and used as a control for equal loading. **(B)** PCA analysis of H3K4me3  
848 ChIPseq replicates. We analyzed amygdala tissue from 2 to 3 animals (rep1-3) for each  
849 genotype (see Methods). **(C)** Number of H3K4me3 DMRs in 2a-HET, 5c-KO, or DM  
850 compared to WT across the genome. 2A-HET DMRs are retrieved with a relaxed  
851 threshold ( $p < 0.05$ ). **(D)** Direction of H3K4me3 changes between single mutants.  
852 Genes are colored based on the direction of misregulation between the single mutants.  
853 **(E)** Behavior of single-mutant DMRs in DM. Log2 fold change of DMRs relative to WT  
854 were plotted across the three mutants. Boxplot features: box, interquartile range (IQR);  
855 bold line, median; gray dots, individual genes. Associated  $p$  values result from Wilcoxon  
856 signed-rank tests. **(F)** Genomic features of H3K4me3 peaks. **(G)** Involvement of  
857 H3K4me3 restoration near rescued DEGs. H3K4me3 log2 fold changes (FC) are plotted  
858 as function of mRNA log2 FC between DM and single mutants. Red line: linear  
859 regression fitting line with 95% confidence interval (gray shade). The gene numbers fall  
860 into each of the four quadrants as indicated (Q1-Q4). Results ( $p$ ) of  $\chi^2$  test and  
861 Pearson's correlation coefficient ( $r$ ) and  $p$ -value ( $p$ ) are noted.  
862

| Gene symbol    | Encoded protein                            | Chromosome | Description                                                                                                                                                                                                                                                                                         |
|----------------|--------------------------------------------|------------|-----------------------------------------------------------------------------------------------------------------------------------------------------------------------------------------------------------------------------------------------------------------------------------------------------|
| <i>Tacr1</i>   | Tachykinin receptor 1                      | chr6       | Tachykinin receptor (aka neurokinin-1 or Substance-P receptor). G-protein coupled receptors found across the brain. Elevated <i>TACR1</i> mRNA levels in ASD patients with heightened aggression (49). Decreased aggression in <i>Tacr1</i> -KO mice (50).                                          |
| <i>Lhb</i>     | Beta subunit of luteinizing hormone (LH)   | chr7       | Major roles of LH in testosterone production. Additional roles of LH in learning and memory functions, e.g. elevated LH impairs spatial memory of rodents (51).                                                                                                                                     |
| <i>Trh</i>     | Thyrotropin-releasing hormone (TRH)        | chr6       | Primary TRH production in hypothalamic neurons. Some production and activity within the hippocampus. TRH stimulates GABA release within CA1 of the hippocampus (52).                                                                                                                                |
| <i>Gabre</i>   | The epsilon subunit of the GABA-A          | chrX       | The epsilon subunit of GABA-A Receptor, an inhibitory chloride channel. Agonist-independent activity produces a tonic inhibitory tone onto neurons (53). Highest in the hypothalamus.                                                                                                               |
| <i>Adcy2</i>   | Adenylyl cyclase 2                         | chr13      | Stimulated by G-protein signaling and PKC. High expression in the soma and dendrites of hippocampal neurons and a proposed role in coincidence detection (54).                                                                                                                                      |
| <i>Adora2a</i> | Adenosine A2a receptor                     | chr10      | A G-protein coupled receptor of extracellular adenosine. A regulator of neurogenesis and hippocampal volume. Modulatory roles of BDNF expression and GABA and glutamate signaling in the hippocampus (55). Increased body mass, anxiety, and heightened aggression in <i>Adora2a</i> -KO mice (56). |
| <i>Pomc</i>    | Pro-opiomelanocortin                       | chr12      | A peptide hormone regulating the hypothalamic function such as feeding. High expression in the hypothalamus, and lower expression in the amygdala and hippocampus. Implicated in the cognitive decline of Alzheimer's disease (31).                                                                 |
| <i>Mc3r</i>    | Melanocortin 3 receptor                    | chr2       | MC3R is receptor for cleavage products of POMC. The hypothalamic function in weight and feeding. Roles in hippocampal memory consolidation (33).                                                                                                                                                    |
| <i>Agt</i>     | Angiotensinogen                            | chr8       | A peptide hormone primarily produced by astrocytes and converted into Angiotensin, neuroactive peptides. Well-known roles in vascular regulation, such as blood pressure. Angiotensin II inhibits LTP in the dentate gyrus in the hippocampus (57).                                                 |
| <i>P2ry14</i>  | Purinergic receptor P2Y, G-protein coupled | chr3       | G-protein coupled receptor that binds UDP-glucose.                                                                                                                                                                                                                                                  |

863

864

**Table 1. Rescued 5C-DEGs that drove enrichment of the KEGG pathway “Neuroactive ligand-receptor interaction”**



## 865 References

866

- 867 1. Faundes V, Newman WG, Bernardini L, Canham N, Clayton-Smith J, Dallapiccola B, et  
868 al. Histone Lysine Methylases and Demethylases in the Landscape of Human  
869 Developmental Disorders. *Am J Hum Genet.* 2018;102(1):175-87.
- 870 2. Kouzarides T. Chromatin modifications and their function. *Cell.* 2007;128(4):693-  
871 705.
- 872 3. Iwase S, and Shi Y. Histone and DNA modifications in mental retardation. *Progress in*  
873 *drug research Fortschritte der Arzneimittelforschung Progres des recherches*  
874 *pharmaceutiques.* 2011;67:147-73.
- 875 4. Barski A, Cuddapah S, Cui K, Roh TY, Schones DE, Wang Z, et al. High-resolution  
876 profiling of histone methylations in the human genome. *Cell.* 2007;129(4):823-37.
- 877 5. Heintzman ND, Stuart RK, Hon G, Fu Y, Ching CW, Hawkins RD, et al. Distinct and  
878 predictive chromatin signatures of transcriptional promoters and enhancers in the  
879 human genome. *Nature genetics.* 2007;39(3):311-8.
- 880 6. Vermeulen M, Mulder KW, Denissov S, Pijnappel WW, van Schaik FM, Varier RA, et  
881 al. Selective anchoring of TFIID to nucleosomes by trimethylation of histone H3  
882 lysine 4. *Cell.* 2007;131(1):58-69.
- 883 7. Lauberth SM, Nakayama T, Wu X, Ferris AL, Tang Z, Hughes SH, et al. H3K4me3  
884 Interactions with TAF3 Regulate Preinitiation Complex Assembly and Selective Gene  
885 Activation. *Cell.* 2013;152(5):1021-36.
- 886 8. Local A, Huang H, Albuquerque CP, Singh N, Lee AY, Wang W, et al. Identification of  
887 H3K4me1-associated proteins at mammalian enhancers. *Nature genetics.*  
888 2018;50(1):73-82.
- 889 9. Allis CD, Berger SL, Cote J, Dent S, Jenuwien T, Kouzarides T, et al. New  
890 nomenclature for chromatin-modifying enzymes. *Cell.* 2007;131(4):633-6.
- 891 10. Vallianatos CN, and Iwase S. Disrupted intricacy of histone H3K4 methylation in  
892 neurodevelopmental disorders. *Epigenomics.* 2015;7(3):503-19.
- 893 11. Aubert Y, Egolf S, and Capell BC. The Unexpected Noncatalytic Roles of Histone  
894 Modifiers in Development and Disease. *Trends Genet.* 2019;35(9):645-57.
- 895 12. Zhang X, Wen H, and Shi X. Lysine methylation: beyond histones. *Acta Biochim*  
896 *Biophys Sin (Shanghai).* 2012;44(1):14-27.
- 897 13. Alarcon JM, Malleret G, Touzani K, Vronskaya S, Ishii S, Kandel ER, et al. Chromatin  
898 acetylation, memory, and LTP are impaired in CBP<sup>+/-</sup> mice: a model for the  
899 cognitive deficit in Rubinstein-Taybi syndrome and its amelioration. *Neuron.*  
900 2004;42(6):947-59.
- 901 14. Bjornsson HT, Benjamin JS, Zhang L, Weissman J, Gerber EE, Chen YC, et al. Histone  
902 deacetylase inhibition rescues structural and functional brain deficits in a mouse  
903 model of Kabuki syndrome. *Science translational medicine.* 2014;6(256):256ra135.
- 904 15. Park J, Thomas S, and Munster PN. Epigenetic modulation with histone deacetylase  
905 inhibitors in combination with immunotherapy. *Epigenomics.* 2015;7(4):641-52.
- 906 16. Jones WD, Dafou D, McEntagart M, Woollard WJ, Elmslie FV, Holder-Espinasse M, et  
907 al. De Novo Mutations in MLL Cause Wiedemann-Steiner Syndrome. *American*  
908 *Journal of Human Genetics.* 2012;91(2):358-64.

- 909 17. Jensen LR, Amende M, Gurok U, Moser B, Gimmel V, Tzschach A, et al. Mutations in  
910 the JARID1C gene, which is involved in transcriptional regulation and chromatin  
911 remodeling, cause X-linked mental retardation. *Am J Hum Genet.* 2005;76(2):227-36.
- 912 18. Gupta S, Kim SY, Artis S, Molfese DL, Schumacher A, Sweatt JD, et al. Histone  
913 methylation regulates memory formation. *J Neurosci.* 2010;30(10):3589-99.
- 914 19. Jakovcevski M, Ruan H, Shen EY, Dincer A, Javidfar B, Ma Q, et al. Neuronal  
915 Kmt2a/Mll1 histone methyltransferase is essential for prefrontal synaptic plasticity  
916 and working memory. *J Neurosci.* 2015;35(13):5097-108.
- 917 20. Kerimoglu C, Sakib MS, Jain G, Benito E, Burkhardt S, Capece V, et al. KMT2A and  
918 KMT2B Mediate Memory Function by Affecting Distinct Genomic Regions. *Cell Rep.*  
919 2017;20(3):538-48.
- 920 21. Iwase S, Brookes E, Agarwal S, Badeaux AI, Ito H, Vallianatos CN, et al. A Mouse  
921 Model of X-linked Intellectual Disability Associated with Impaired Removal of  
922 Histone Methylation. *Cell Rep.* 2016.
- 923 22. Scandaglia M, Lopez-Atalaya JP, Medrano-Fernandez A, Lopez-Cascales MT, Del  
924 Blanco B, Lipinski M, et al. Loss of Kdm5c Causes Spurious Transcription and  
925 Prevents the Fine-Tuning of Activity-Regulated Enhancers in Neurons. *Cell Rep.*  
926 2017;21(1):47-59.
- 927 23. Cao F, Townsend EC, Karatas H, Xu J, Li L, Lee S, et al. Targeting MLL1 H3K4  
928 methyltransferase activity in mixed-lineage leukemia. *Mol Cell.* 2014;53(2):247-61.
- 929 24. Varholick JA, Bailoo JD, Palme R, and Würbel H. Phenotypic variability between  
930 Social Dominance Ranks in laboratory mice. *Sci Rep.* 2018;8(1):6593.
- 931 25. Penzes P, Cahill ME, Jones KA, VanLeeuwen JE, and Woolfrey KM. Dendritic spine  
932 pathology in neuropsychiatric disorders. *Nat Neurosci.* 2011;14(3):285-93.
- 933 26. Yang Y, and Wang JZ. From Structure to Behavior in Basolateral Amygdala-  
934 Hippocampus Circuits. *Front Neural Circuits.* 2017;11:86.
- 935 27. Arbeitman MN. Maternal Experience Leads to Lasting Gene Expression Changes in  
936 Some Regions of the Mouse Brain. *G3 (Bethesda).* 2019;9(8):2623-8.
- 937 28. Outchkourov NS, Muino JM, Kaufmann K, van Ijcken WF, Groot Koerkamp MJ, van  
938 Leenen D, et al. Balancing of histone H3K4 methylation states by the Kdm5c/SMCX  
939 histone demethylase modulates promoter and enhancer function. *Cell Rep.*  
940 2013;3(4):1071-9.
- 941 29. Civelli O, Birnberg N, and Herbert E. Detection and quantitation of pro-  
942 opiomelanocortin mRNA in pituitary and brain tissues from different species. *J Biol*  
943 *Chem.* 1982;257(12):6783-7.
- 944 30. Pałasz A, Bandyszewska M, Rojczyk E, and Wiaderkiewicz R. Effect of extended  
945 olanzapine administration on POMC and neuropeptide Y mRNA levels in the male  
946 rat amygdala and hippocampus. *Pharmacol Rep.* 2016;68(2):292-6.
- 947 31. Shen Y, Tian M, Zheng Y, Gong F, Fu AKY, and Ip NY. Stimulation of the Hippocampal  
948 POMC/MC4R Circuit Alleviates Synaptic Plasticity Impairment in an Alzheimer's  
949 Disease Model. *Cell Rep.* 2016;17(7):1819-31.
- 950 32. Roselli-Reh fuss L, Mountjoy KG, Robbins LS, Mortrud MT, Low MJ, Tatro JB, et al.  
951 Identification of a receptor for gamma melanotropin and other  
952 proopiomelanocortin peptides in the hypothalamus and limbic system. *Proceedings*  
953 *of the National Academy of Sciences of the United States of America.*  
954 1993;90(19):8856-60.

- 955 33. Machado I, González P, Schiöth HB, Lasaga M, and Scimonelli TN.  $\alpha$ -Melanocyte-  
956 stimulating hormone ( $\alpha$ -MSH) reverses impairment of memory reconsolidation  
957 induced by interleukin-1 beta (IL-1 beta) hippocampal infusions. *Peptides*.  
958 2010;31(11):2141-4.
- 959 34. Shah RN, Grzybowski AT, Cornett EM, Johnstone AL, Dickson BM, Boone BA, et al.  
960 Examining the Roles of H3K4 Methylation States with Systematically Characterized  
961 Antibodies. *Mol Cell*. 2018;72(1):162-77 e7.
- 962 35. Zhang X, Su J, Jeong M, Ko M, Huang Y, Park HJ, et al. DNMT3A and TET2 compete  
963 and cooperate to repress lineage-specific transcription factors in hematopoietic  
964 stem cells. *Nature genetics*. 2016;48(9):1014-23.
- 965 36. Ramakrishnan S, Pokhrel S, Palani S, Pflueger C, Parnell TJ, Cairns BR, et al.  
966 Counteracting H3K4 methylation modulators Set1 and Jhd2 co-regulate chromatin  
967 dynamics and gene transcription. *Nat Commun*. 2016;7:11949.
- 968 37. Mishra S, Van Rechem C, Pal S, Clarke TL, Chakraborty D, Mahan SD, et al. Cross-talk  
969 between Lysine-Modifying Enzymes Controls Site-Specific DNA Amplifications. *Cell*.  
970 2018;175(6):1716.
- 971 38. Cao K, Collings CK, Morgan MA, Marshall SA, Rendleman EJ, Ozark PA, et al. An  
972 Mll4/COMPASS-Lsd1 epigenetic axis governs enhancer function and pluripotency  
973 transition in embryonic stem cells. *Sci Adv*. 2018;4(1):eaap8747.
- 974 39. Vallianatos CN, Farrehi C, Friez MJ, Burmeister M, Keegan CE, and Iwase S. Altered  
975 Gene-Regulatory Function of KDM5C by a Novel Mutation Associated With Autism  
976 and Intellectual Disability. *Front Mol Neurosci*. 2018;11:104.
- 977 40. Liu X, and Secombe J. The Histone Demethylase KDM5 Activates Gene Expression by  
978 Recognizing Chromatin Context through Its PHD Reader Motif. *Cell Rep*.  
979 2015;13(10):2219-31.
- 980 41. Zamurrad S, Hatch HAM, Drelon C, Belalcazar HM, and Secombe J. A Drosophila  
981 Model of Intellectual Disability Caused by Mutations in the Histone Demethylase  
982 KDM5. *Cell Rep*. 2018;22(9):2359-69.
- 983 42. Chen K, Luan X, Liu Q, Wang J, Chang X, Snijders AM, et al. Drosophila Histone  
984 Demethylase KDM5 Regulates Social Behavior through Immune Control and Gut  
985 Microbiota Maintenance. *Cell Host Microbe*. 2019;25(4):537-52 e8.
- 986 43. McCann KE, Sinkiewicz DM, Rosenhauer AM, Beach LQ, and Huhman KL.  
987 Transcriptomic Analysis Reveals Sex-Dependent Expression Patterns in the  
988 Basolateral Amygdala of Dominant and Subordinate Animals After Acute Social  
989 Conflict. *Mol Neurobiol*. 2018.
- 990 44. McMahan KA, Hiew SY, Hadjur S, Veiga-Fernandes H, Menzel U, Price AJ, et al. Mll  
991 has a critical role in fetal and adult hematopoietic stem cell self-renewal. *Cell Stem*  
992 *Cell*. 2007;1(3):338-45.
- 993 45. Silva AJ, Simpson EM, Takahashi JS, Lipp HP, Nakanishi S, Wehner JM, et al. Mutant  
994 mice and neuroscience: recommendations concerning genetic background. Banbury  
995 Conference on genetic background in mice. *Neuron*. 1997;19(4):755-9.
- 996 46. Brind'Amour J, Liu S, Hudson M, Chen C, Karimi MM, and Lorincz MC. An ultra-low-  
997 input native ChIP-seq protocol for genome-wide profiling of rare cell populations.  
998 *Nat Commun*. 2015;6:6033.

- 999 47. Edgar R, Domrachev M, and Lash AE. Gene Expression Omnibus: NCBI gene  
1000 expression and hybridization array data repository. *Nucleic Acids Res.*  
1001 2002;30(1):207-10.
- 1002 48. Warton DI, Wright IJ, Falster DS, and Westoby M. Bivariate line-fitting methods for  
1003 allometry. *Biol Rev Camb Philos Soc.* 2006;81(2):259-91.
- 1004 49. Sener EF, Taheri S, Sahin MC, Bayramov KK, Marasli MK, Zararsiz G, et al. Altered  
1005 Global mRNA Expressions of Pain and Aggression Related Genes in the Blood of  
1006 Children with Autism Spectrum Disorders. *J Mol Neurosci.* 2019;67(1):89-96.
- 1007 50. De Felipe C, Herrero JF, O'Brien JA, Palmer JA, Doyle CA, Smith AJ, et al. Altered  
1008 nociception, analgesia and aggression in mice lacking the receptor for substance P.  
1009 *Nature.* 1998;392(6674):394-7.
- 1010 51. Burnham V, Sundby C, Laman-Maharg A, and Thornton J. Luteinizing hormone acts  
1011 at the hippocampus to dampen spatial memory. *Horm Behav.* 2017;89:55-63.
- 1012 52. Deng PY, Porter JE, Shin HS, and Lei S. Thyrotropin-releasing hormone increases  
1013 GABA release in rat hippocampus. *J Physiol.* 2006;577(Pt 2):497-511.
- 1014 53. Neelands TR, Fisher JL, Bianchi M, and Macdonald RL. Spontaneous and gamma-  
1015 aminobutyric acid (GABA)-activated GABA(A) receptor channels formed by epsilon  
1016 subunit-containing isoforms. *Mol Pharmacol.* 1999;55(1):168-78.
- 1017 54. Baker LP, Nielsen MD, Impey S, Hacker BM, Poser SW, Chan MY, et al. Regulation and  
1018 immunohistochemical localization of betagamma-stimulated adenylyl cyclases in  
1019 mouse hippocampus. *J Neurosci.* 1999;19(1):180-92.
- 1020 55. Vaz SH, Lérias SR, Parreira S, Diógenes MJ, and Sebastião AM. Adenosine A2A  
1021 receptor activation is determinant for BDNF actions upon GABA and glutamate  
1022 release from rat hippocampal synaptosomes. *Purinergic Signal.* 2015;11(4):607-12.
- 1023 56. Ledent C, Vaugeois JM, Schiffmann SN, Pedrazzini T, El Yacoubi M, Vanderhaeghen JJ,  
1024 et al. Aggressiveness, hypoalgesia and high blood pressure in mice lacking the  
1025 adenosine A2a receptor. *Nature.* 1997;388(6643):674-8.
- 1026 57. Denny JB, Polan-Curtain J, Wayner MJ, and Armstrong DL. Angiotensin II blocks  
1027 hippocampal long-term potentiation. *Brain Res.* 1991;567(2):321-4.  
1028

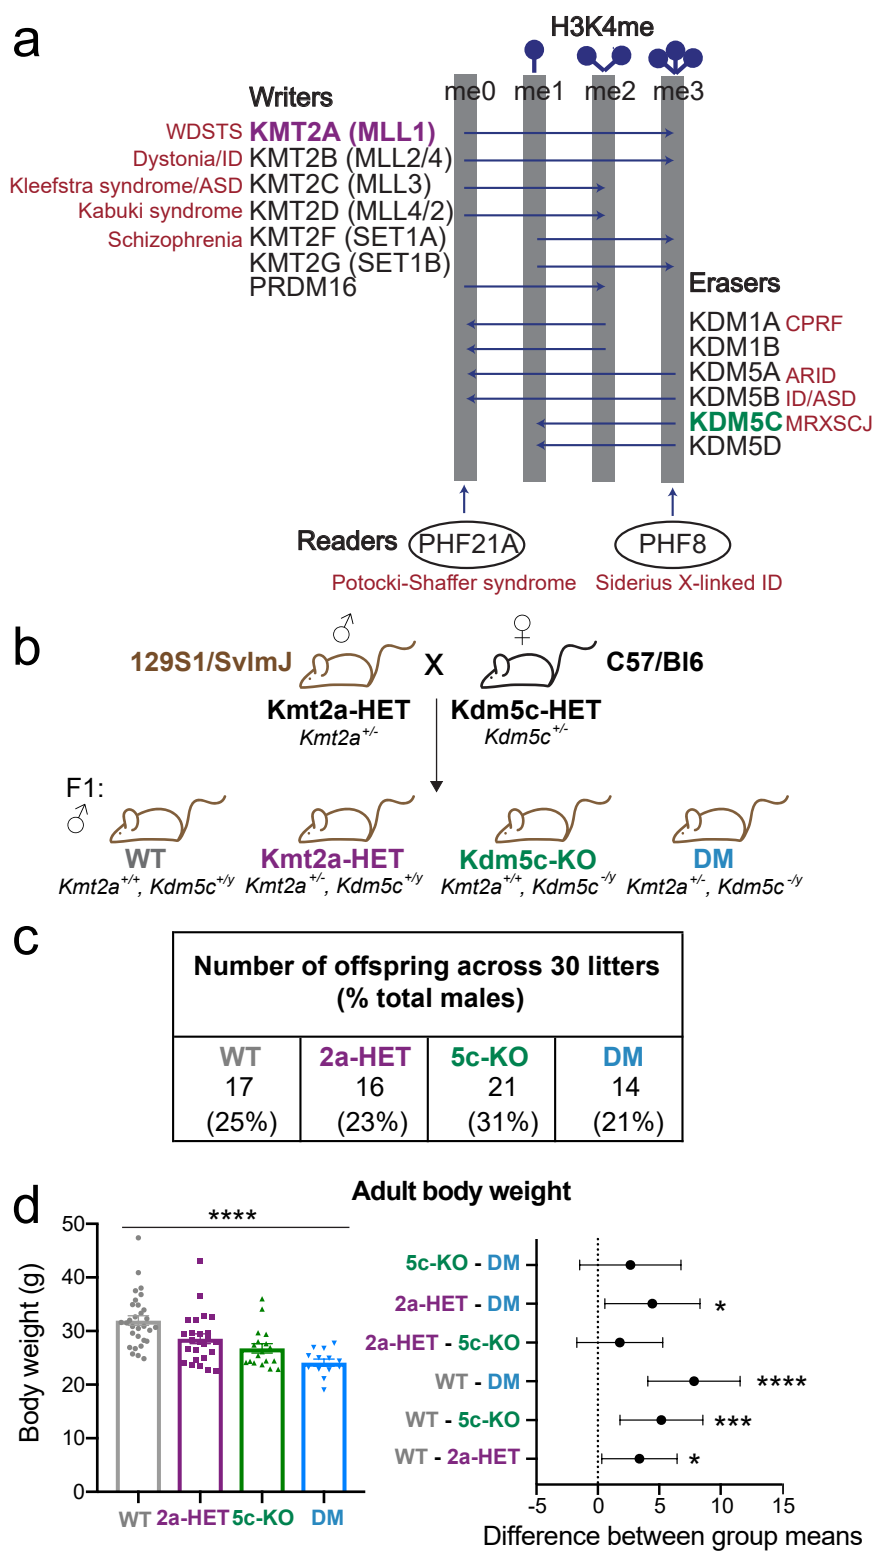

Figure 1

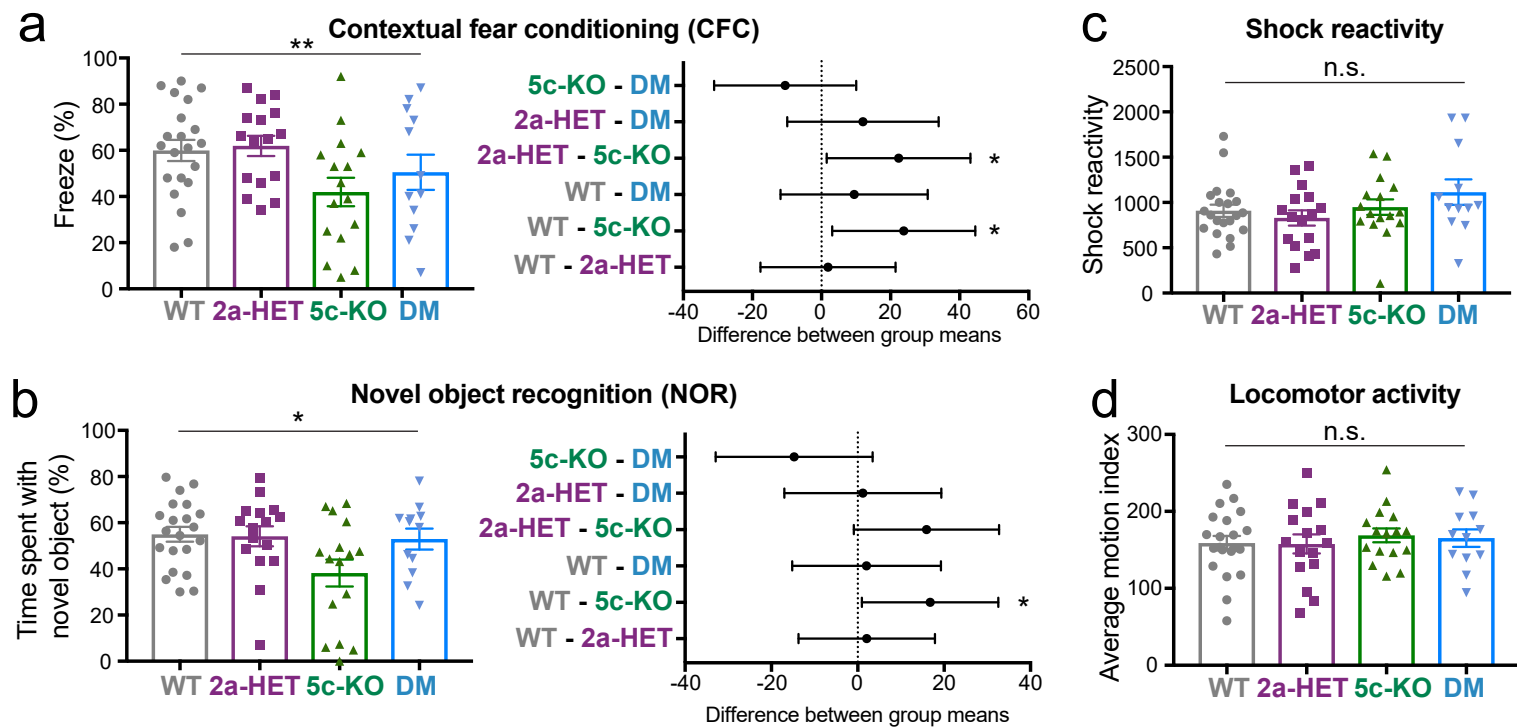

Figure 2

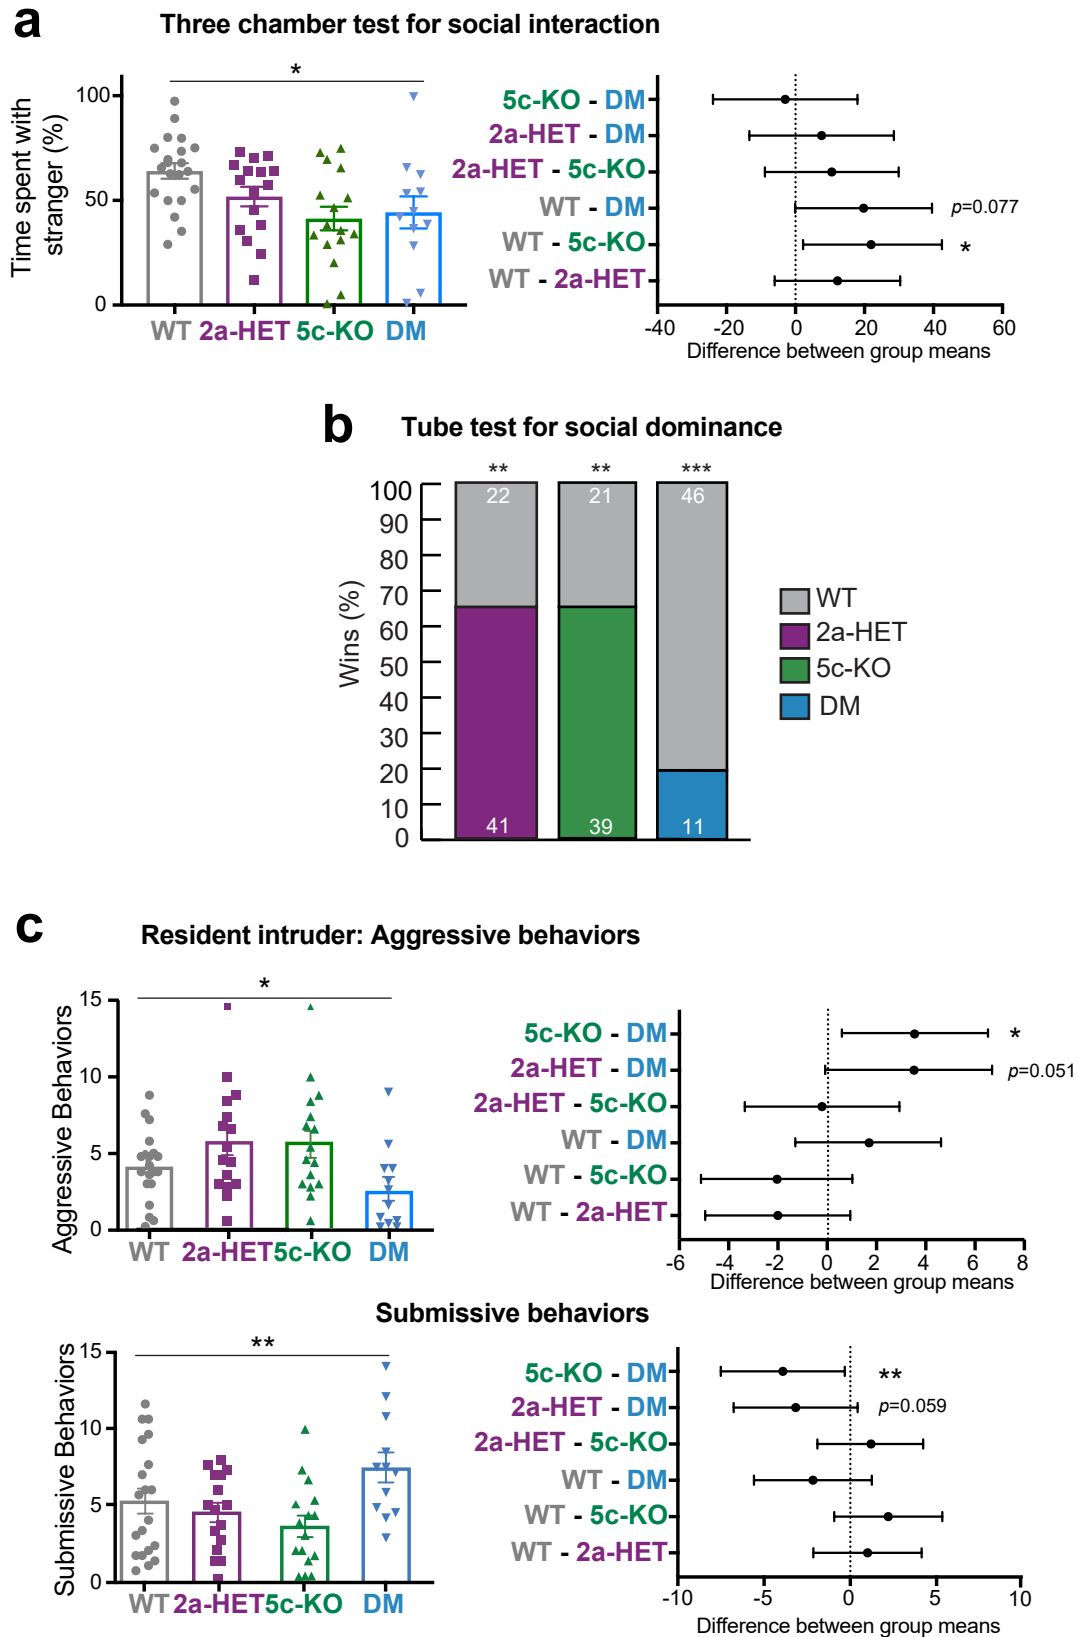

Figure 3



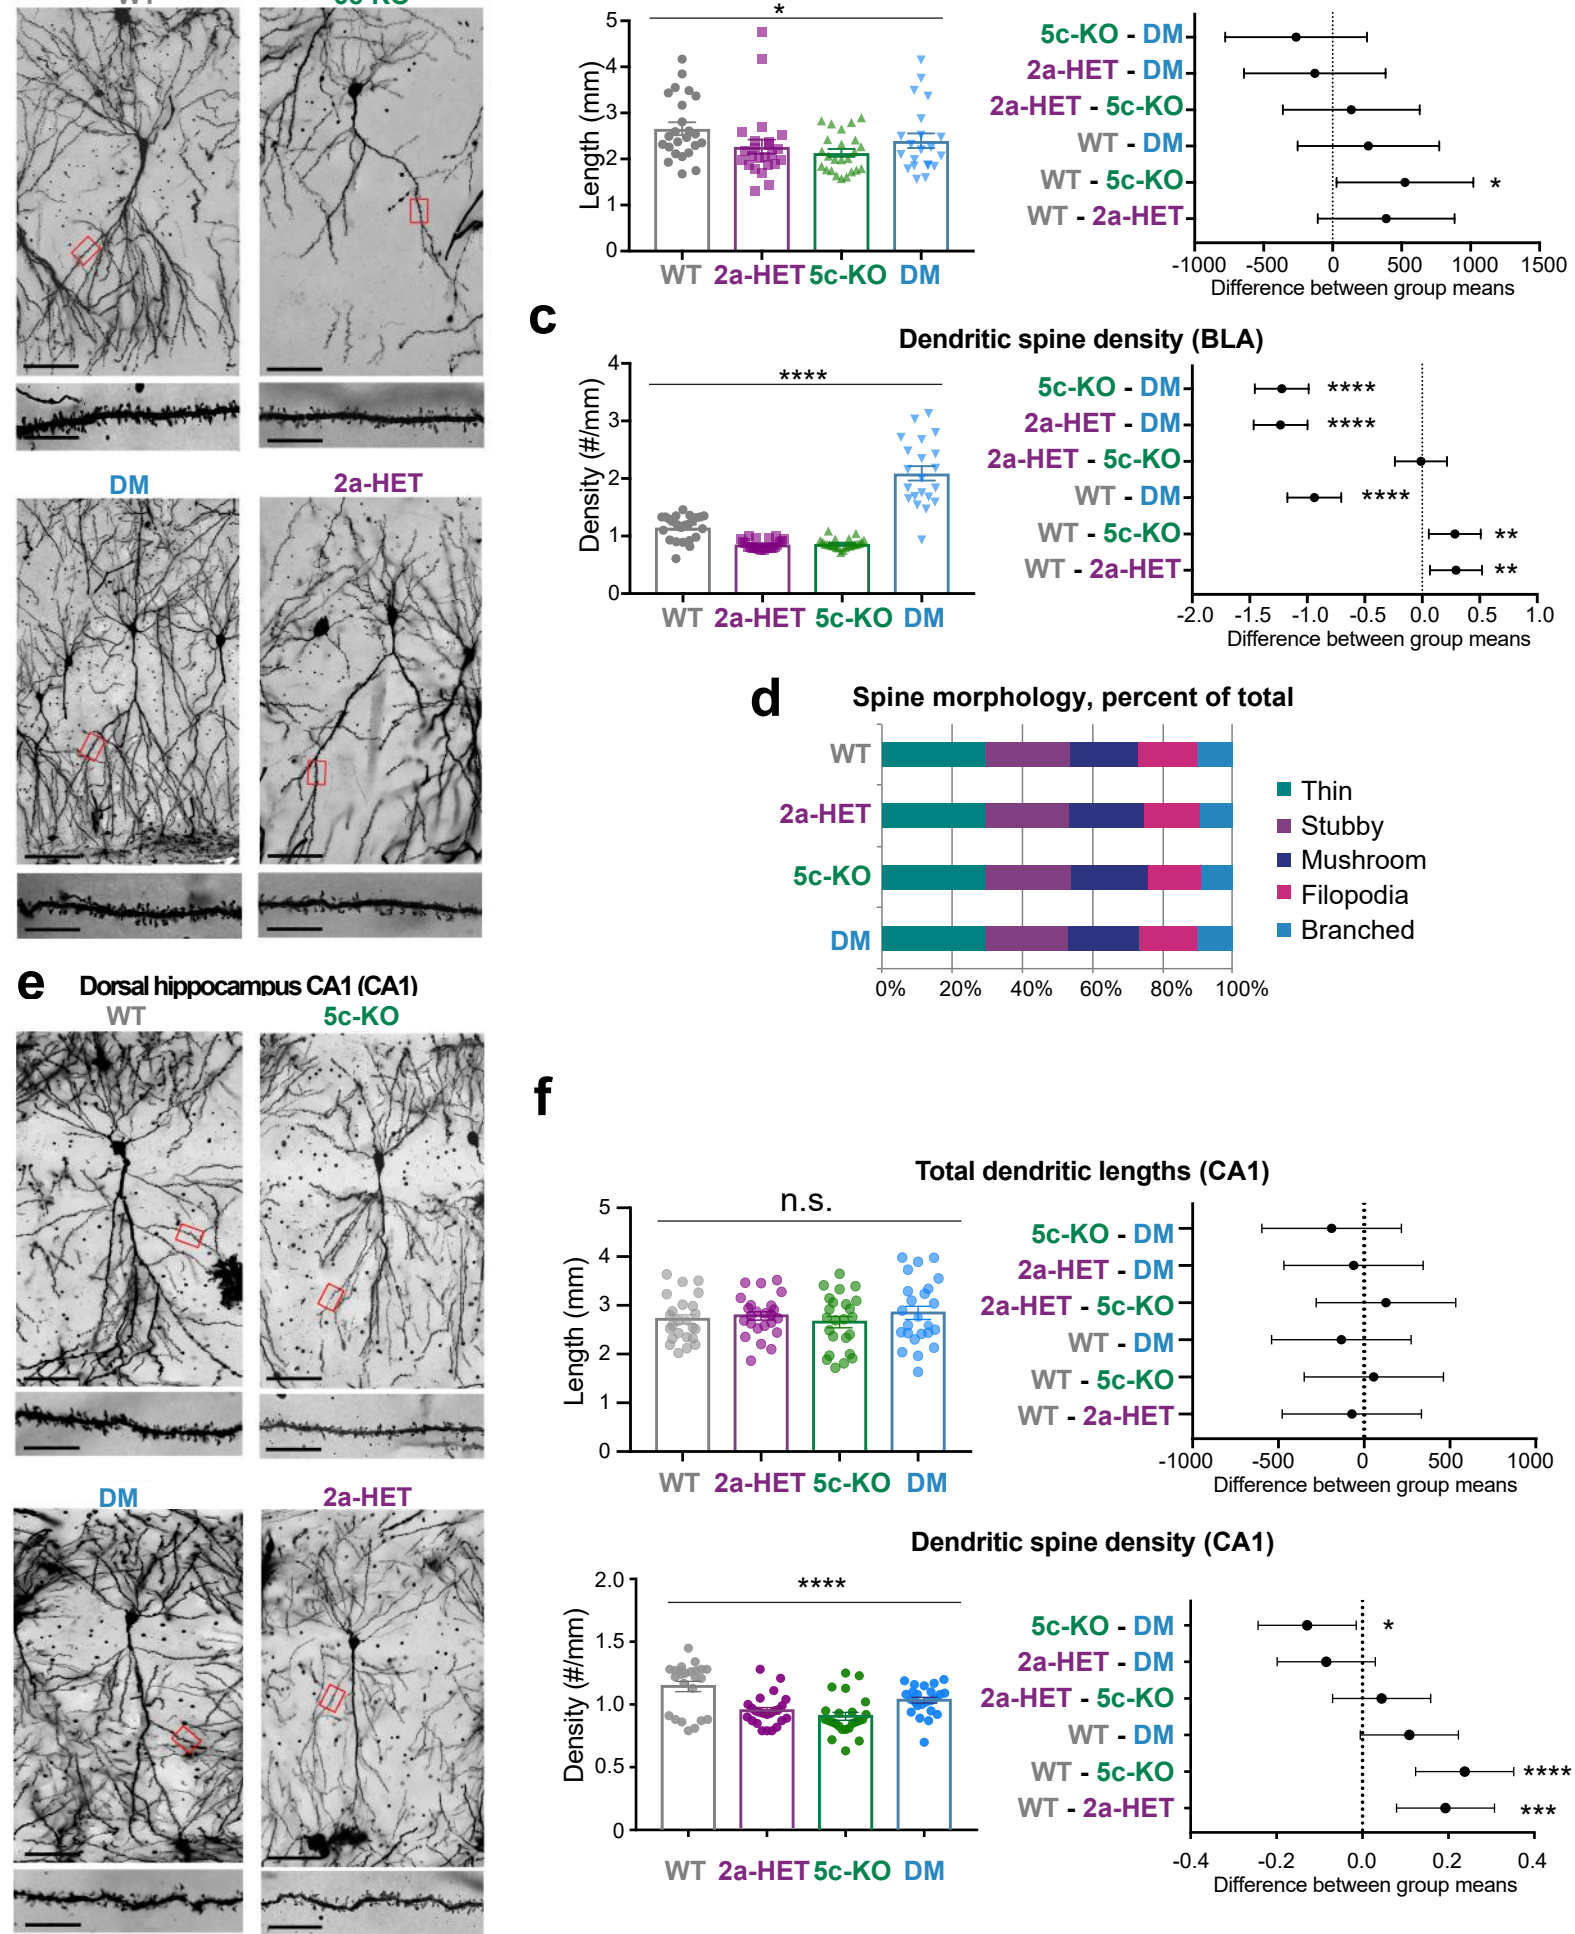

Figure 4



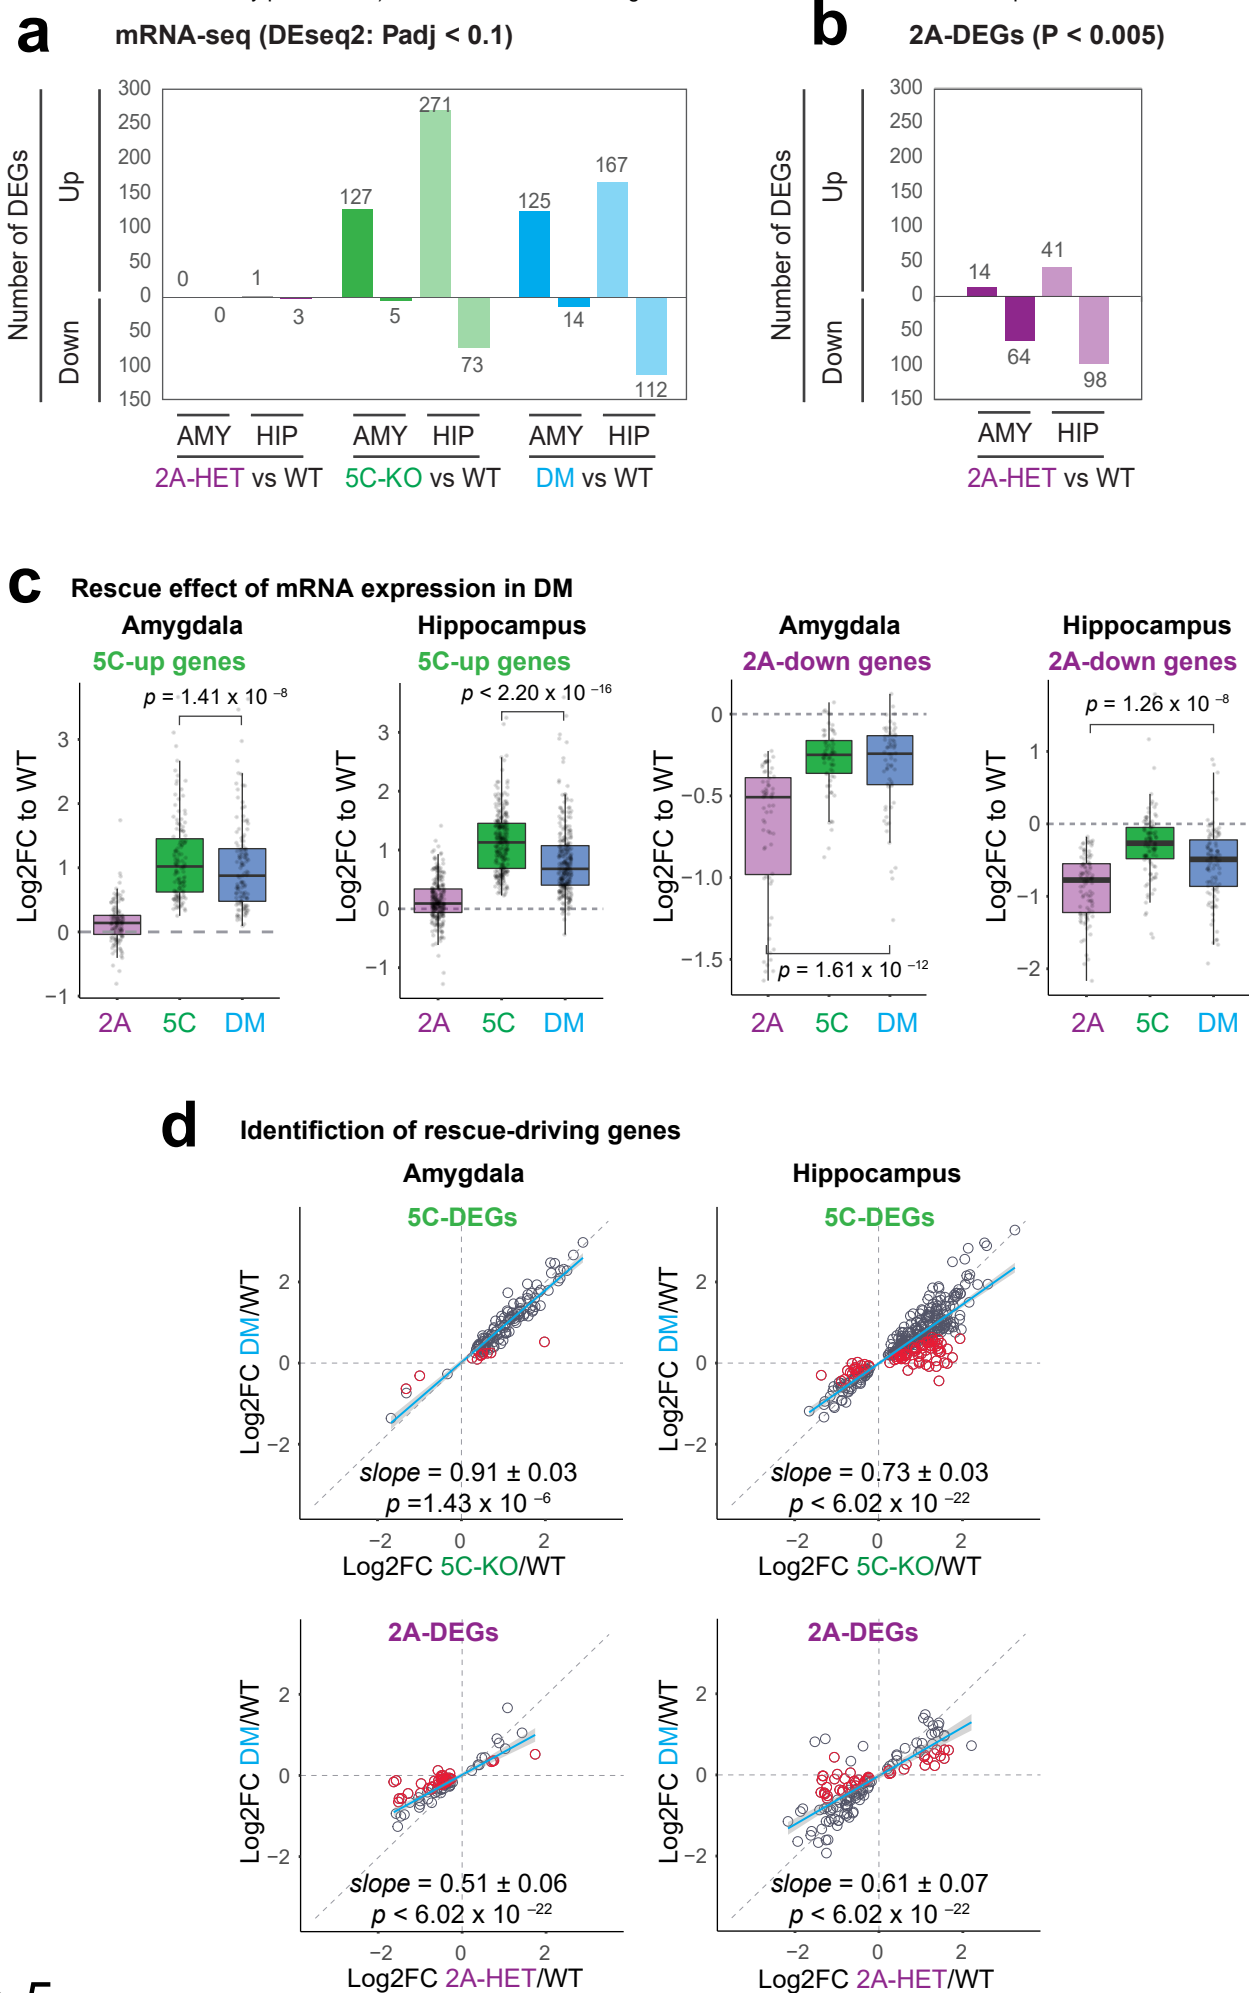

Figure 5

**a** Global H3K4me level (AMY)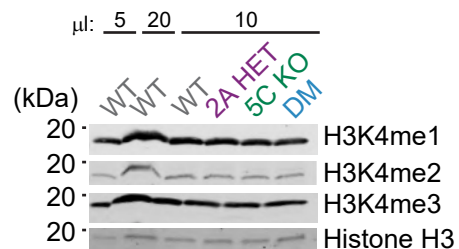**b** Inter-replicate distance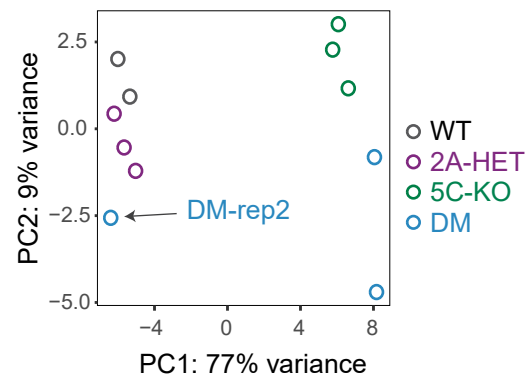**c** Number of DMRs in AMY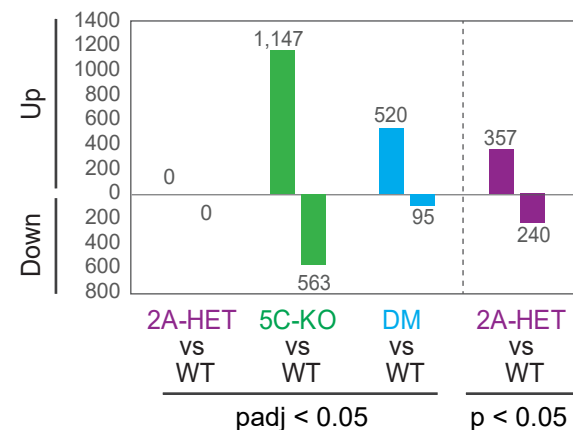**d** Direction of H3K4me3 changes between single mutants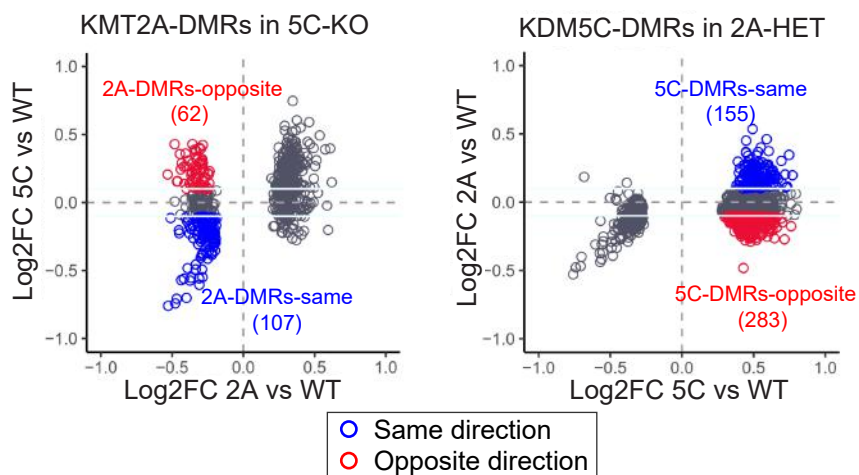**e** Behavior of 2A- and 5C-DMRs in DM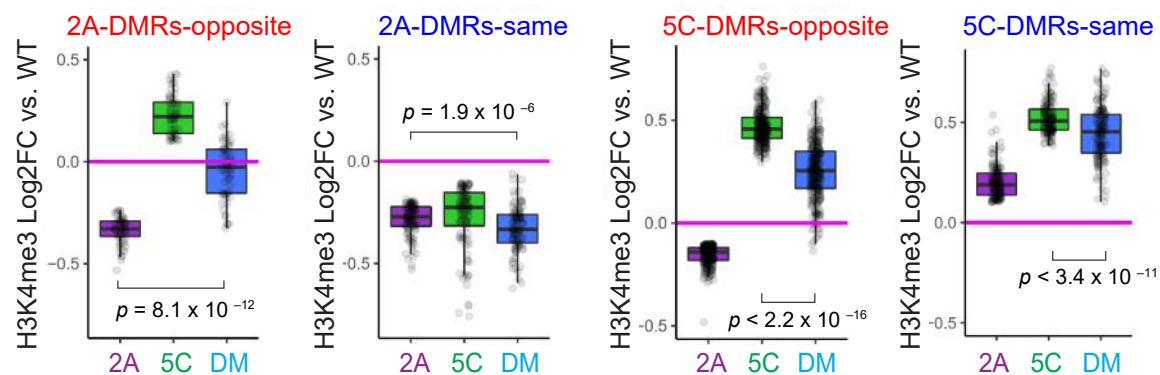**f** Genomic feature distribution of H3K4me3 peaks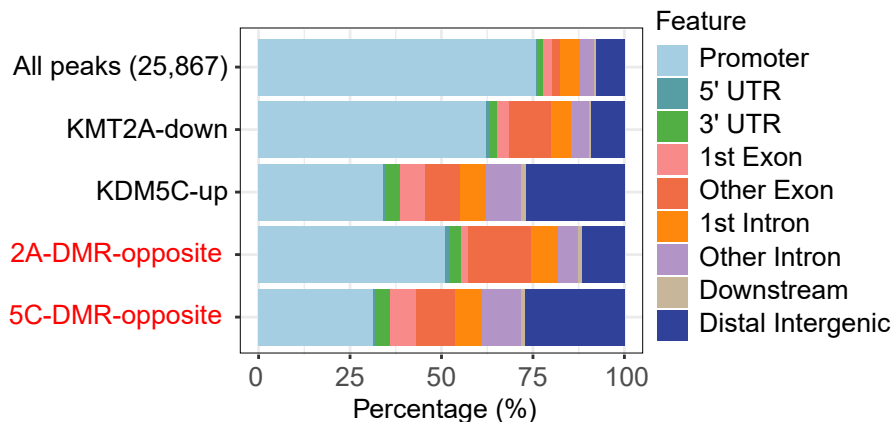**g** Correlation of mRNA vs H3K4me3 levels of rescued genes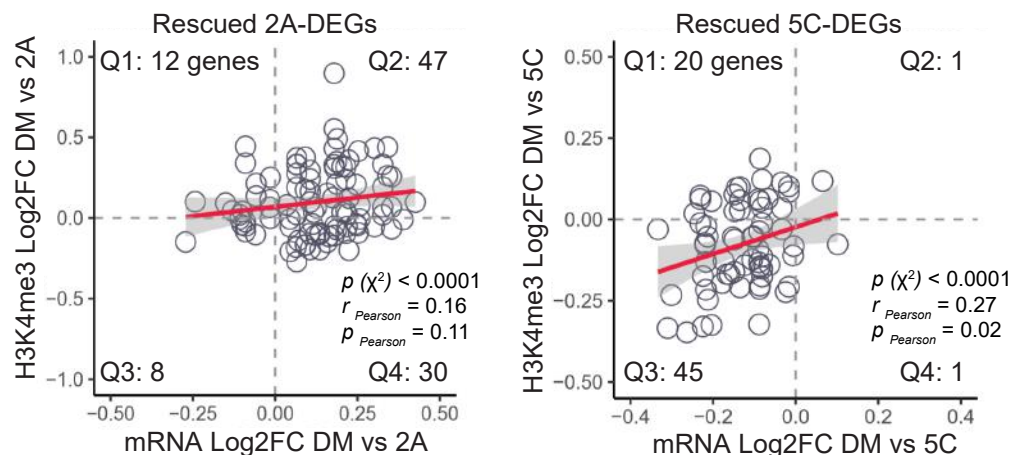

Figure 6

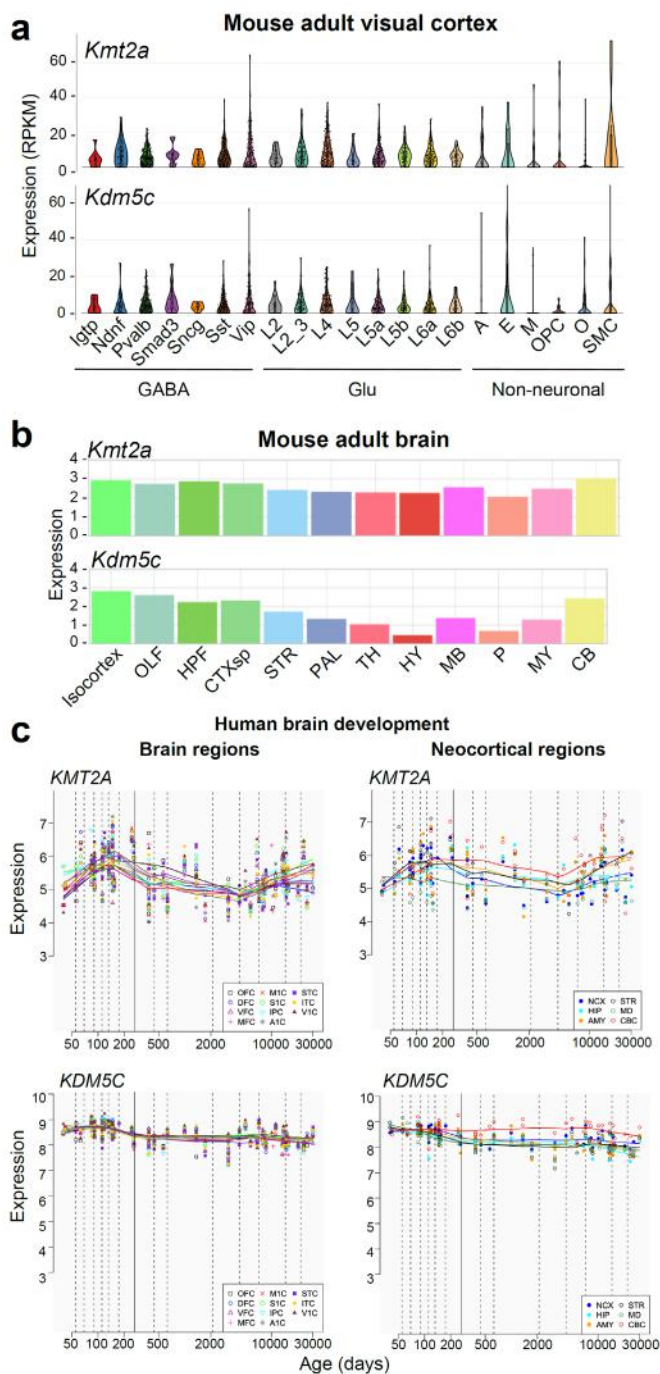

**Supplementary Figure 1. Expression of KMT2A and KDM5C.** (A) Expression of *Kmt2a* and *Kdm5c*, from FACS-sorted single cells of mouse visual cortex, shown in reads per kilobase of transcript per million mapped reads (RPKM). Neuronal cells: GABAergic (GABA), Glutamatergic (Glu). Non-neuronal cells: astrocytes (A); endothelial cells (E); microglia (M), oligodendrocyte precursor cells (OPC); oligodendrocytes (O); smooth muscle cells (SMC). Image credit: Broad Institute “Single Cell Portal” transcriptome of adult mouse visual cortex (1). (B) Expression of *Kmt2a* and *Kdm5c* mRNA from adult mouse brain, shown in log<sub>2</sub> of raw expression value from *in situ* hybridization. Brain regions: Isocortex, olfactory areas (OLF), hippocampal formation (HPF), cortical subplate (CTXsp), striatum (STR), pallidum (PAL), thalamus (TH), hypothalamus (HY), midbrain (MB), pons (P), medulla (MY), cerebellum (CB). Image credit: Allen Institute, Allen Mouse Brain Atlas (2004) (2). (C) Expression of *KMT2A* and *KDM5C* transcripts, from developing and adult human brains, shown in RPKM. Human development and adulthood were split into the following Periods: 1-7 fetal development; 8-9 birth and infancy; 10-11 childhood; 12 adolescence; and 13-15 adulthood. Image credit: Human Brain Transcriptome Atlas (3, 4)

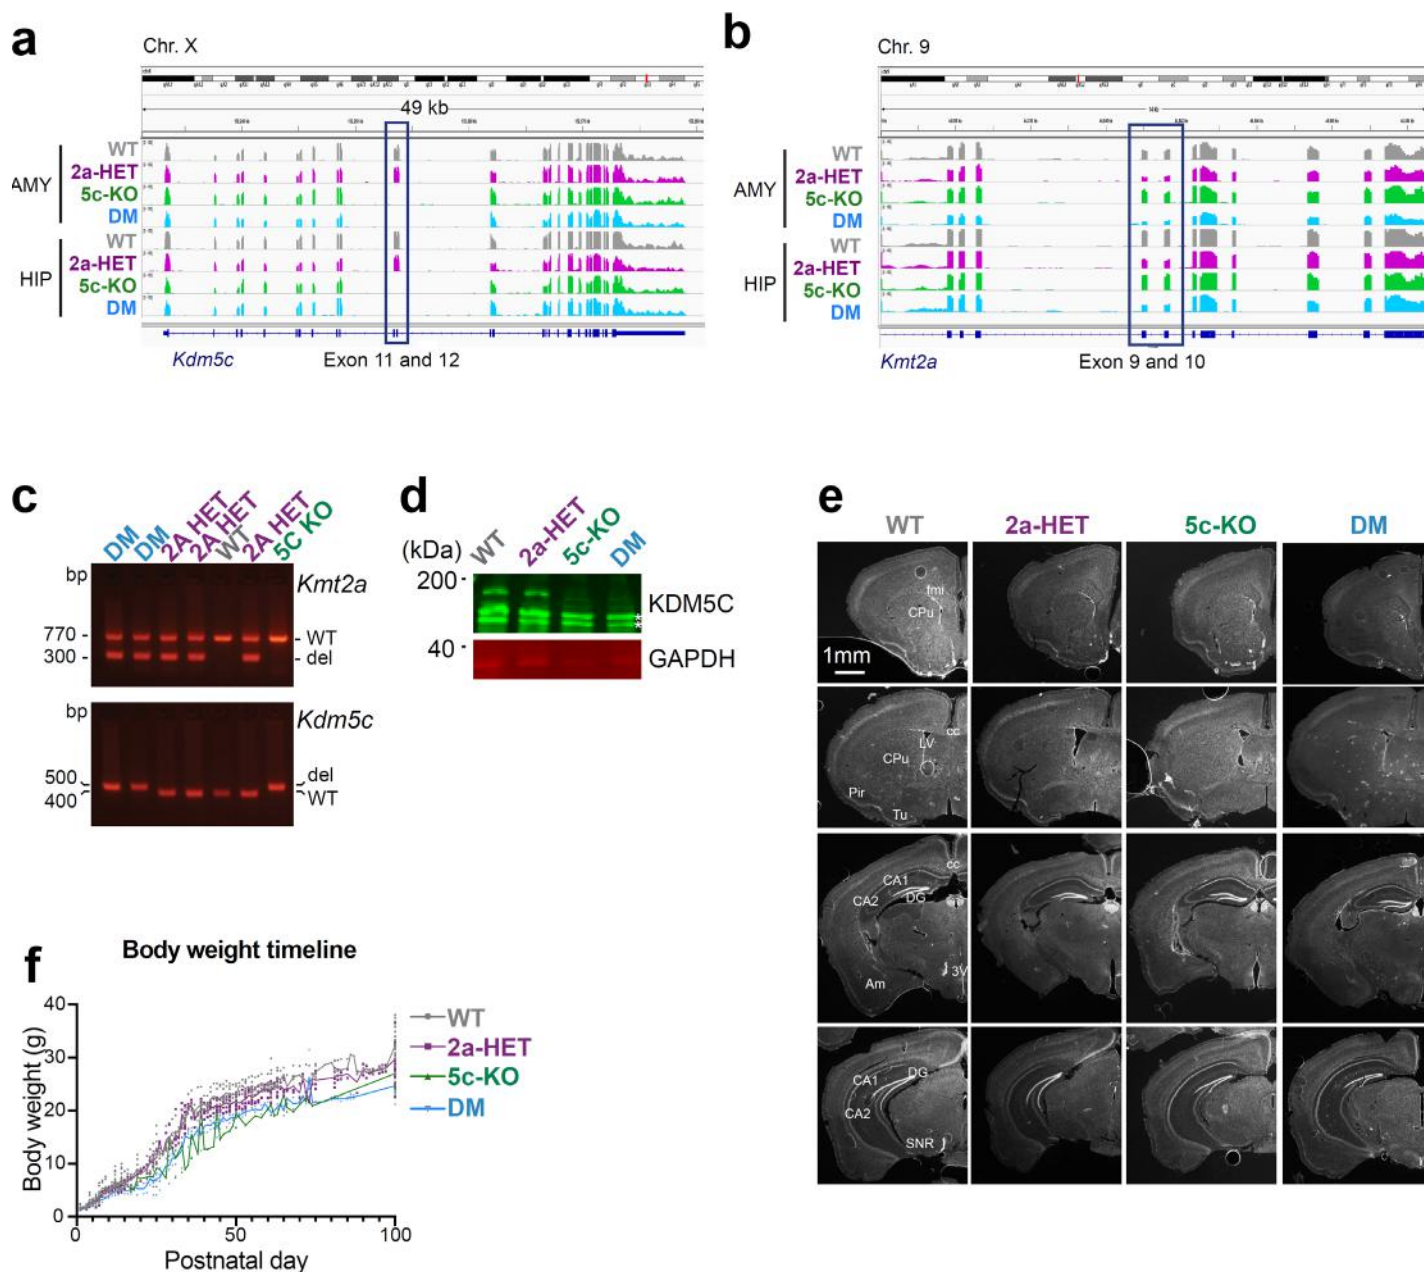

**Supplementary Figure 2. Basic features of mutant mice. (A-B)** RNA-seq read coverage of *Kmt2a* (A) and *Kdm5c* (B) genes and targeted exons (highlight) confirmed the intended gene manipulations. **(C)** Genotyping using genomic DNA, confirming presence of *Kmt2a* and/or *Kdm5c* deleted alleles (“del”) only in appropriate genotypes. **(D)** Western blot for KDM5C protein. Stars indicate non-specific bands present in all samples. GAPDH shown for equal loading. **(E)** Serial brain sections 30  $\mu$ m thick stained with DAPI to mark nuclei. Sections shown at Bregma regions 1.41, 0.49, -2.15, and -2.91 mm (top to bottom). Regions highlighted: anterior forceps of the corpus callosum (fmi), caudate putamen (CPu), corpus callosum (cc), lateral ventricle (LV), piriform cortex (Pir), olfactory tubercle (Tu), hippocampal fields CA1 and CA2, dentate gyrus (DG), anteromedial nucleus (AM), third ventricle (3V), substantia nigra pars reticularis (SNR). Scale bar: 1mm. **(F)** Body weight tracked from birth, postnatal day 1 (P1).



**a Resident intruder: aggressive behaviors**

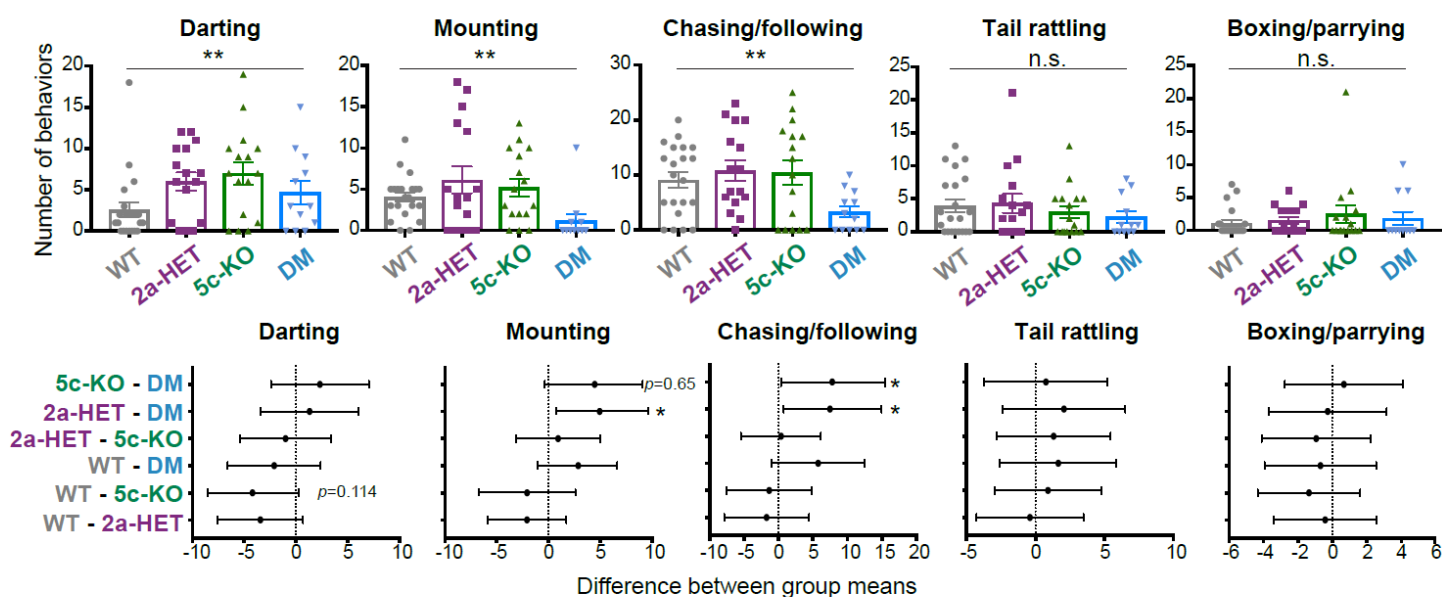

**b Resident intruder: submissive behaviors**

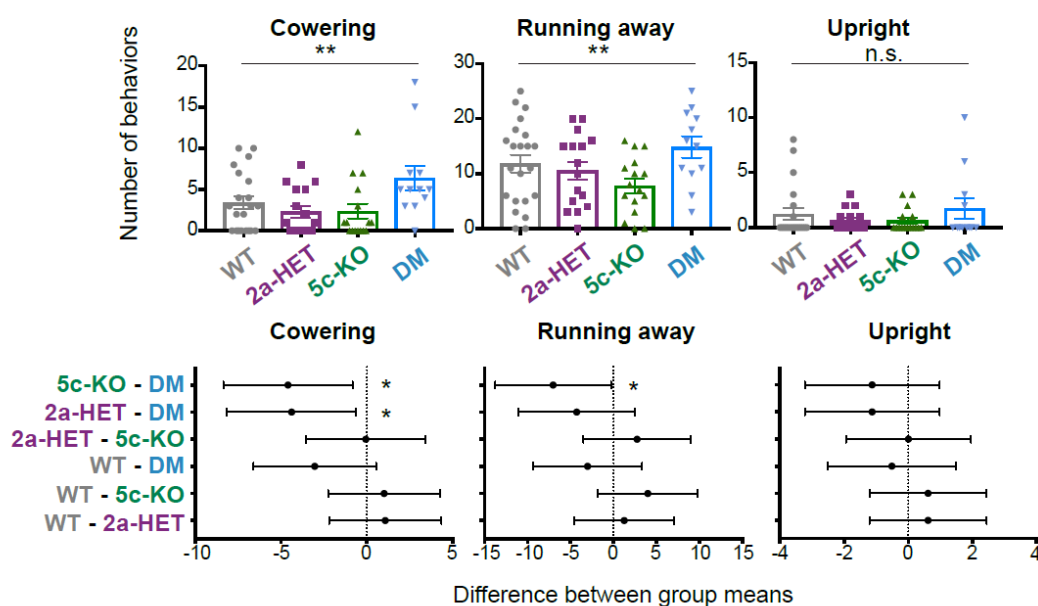

**Supplementary Figure 3. Individual behavior types in the resident intruder test. (A)** Individual aggressive behaviors (mean  $\pm$  SEM, \*\* $p < 0.01$  in one-way ANOVA). N.S. depicts no statistical difference. Left panel: average number of all submissive behaviors (mean  $\pm$  SEM, \* $p < 0.05$  in one-way ANOVA). Right panel: Difference between group means of submissive behaviors (mean  $\pm$  95% confidence intervals, \* $p < 0.05$ , \*\* $p < 0.01$ ). **(B)** Individual submissive behaviors (mean  $\pm$  SEM, \*\* $p < 0.01$  in one-way ANOVA). N.S. depicts no statistical difference. N=21 WT, N=16 *Kmt2a*-HET, N=16 *Kdm5c*-KO, and N=12 DM animals were used for all studies. Differences between group means all aggressive **(A)** and submissive **(B)** behaviors (mean  $\pm$  95% confidence intervals, \* $p < 0.05$ ).

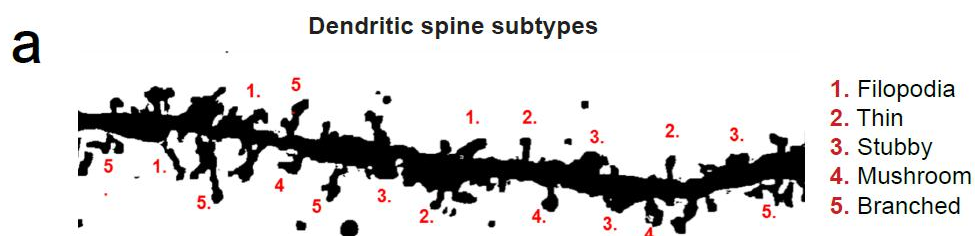

**Supplementary Figure 4. Schematic of dendrite spine subtype analysis. (A)** Projection image of a dendritic segment from a series of Z stack images derived from BLA pyramidal cells. Numerical marks adjacent to corresponding spine subtypes, represented as: 1. Filopodia, 2. Thin, 3. Stubby, 4. Mushroom, and 5. Branched.

**a** Euclidean distances between RNA-seq samples from various brain regions

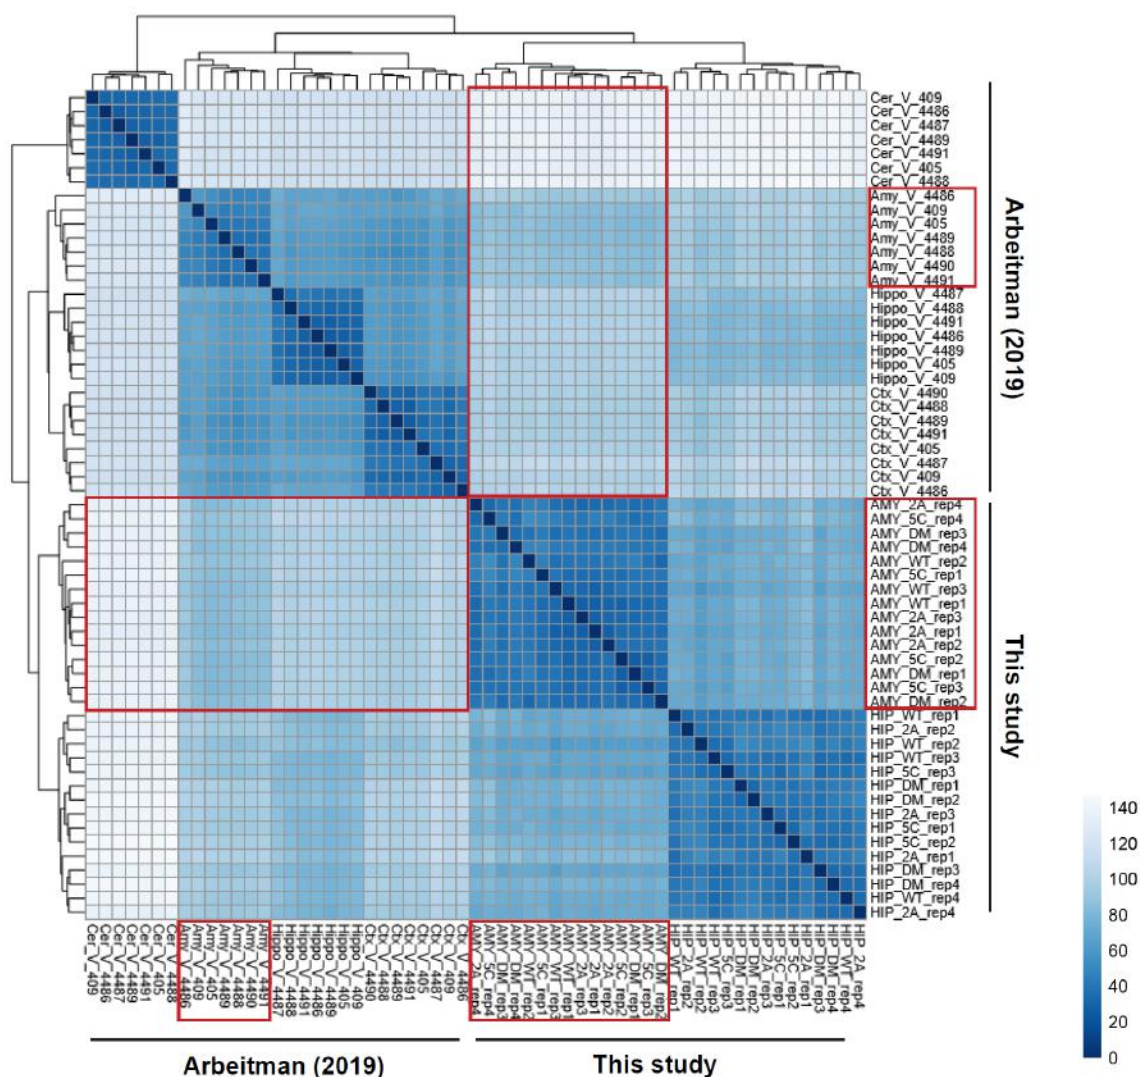

**Supplementary Figure 5. Validation of brain microdissection. (A)** To validate accuracy of our brain microdissection, we compared our RNAseq data of the hippocampus (HIP) and amygdala (AMY) with those of the Arbeitman paper (5), which involved the hippocampus (Hippo), amygdala (Amy), cerebellum (Cer), cerebral cortex (Ctx). Euclidian distance between all combination of RNA-seq data are plotted (see method). Samples from this study and the Arbeitman study are clustered separately, likely due to difference in experimental procedures and/or sex of mice. Our study used adult male mice, while the Arbeitman study used adult females. Nonetheless, our amygdala samples showed the shortest distance to the Arbeitman amygdala data compared to any other brain tissues (red rectangles). Likewise, our hippocampus data are closest to the Arbeitman hippocampus data among the four brain regions. The data demonstrate that the microdissection of brain regions in the two studies are consistent with each other.

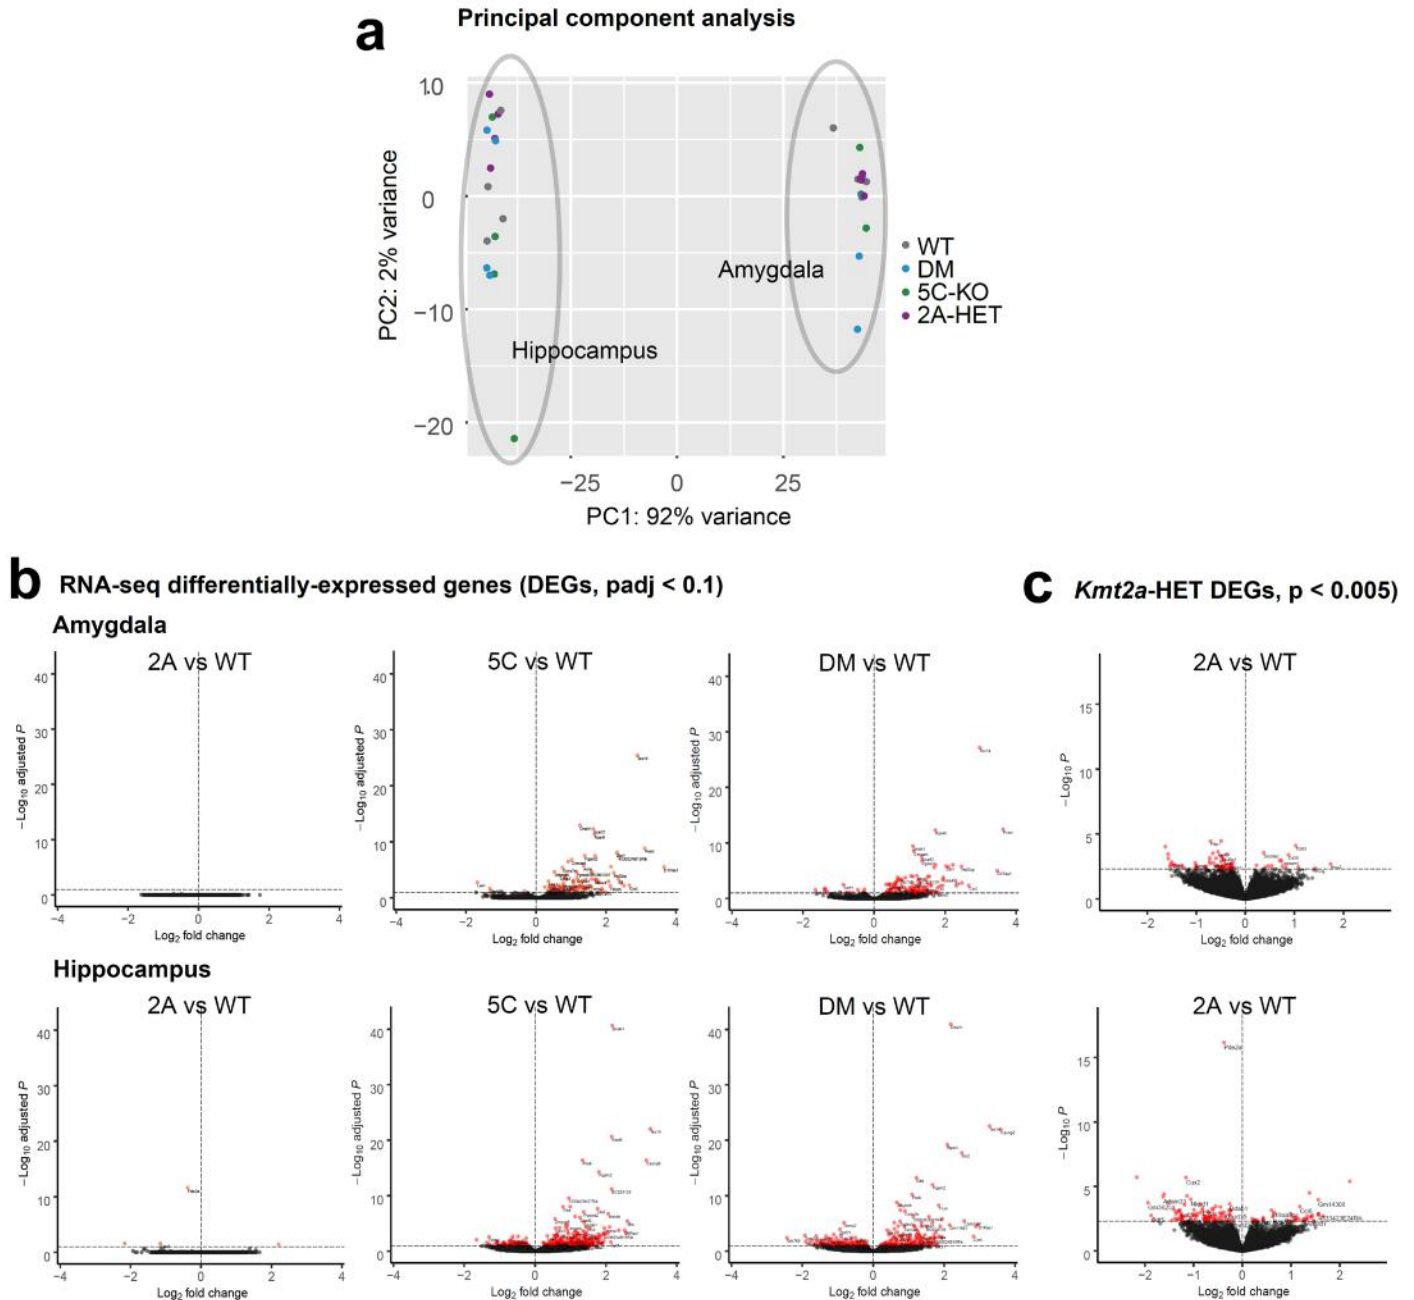

**Supplementary Figure 6. Basic analysis of RNA-seq data. (A)** PCA analysis of RNA-seq libraries. Tissue types are a stronger segregating factor than genotypes. **(B)** Volcano plot representation of differential expressed genes (DEGs) in mutant vs WT comparisons. Red dots: DEGs with  $padj < 0.1$  (see Table S1). **(C)** Mildly dysregulated genes in *Kmt2a*-HET were recovered with a relaxed threshold.



**a** Overlap DEGs between tissues

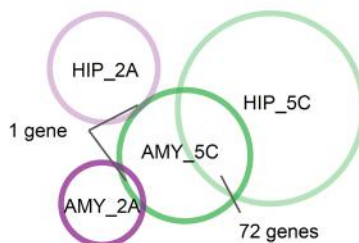

**b** Similarity in DEG expression between the two brain regions

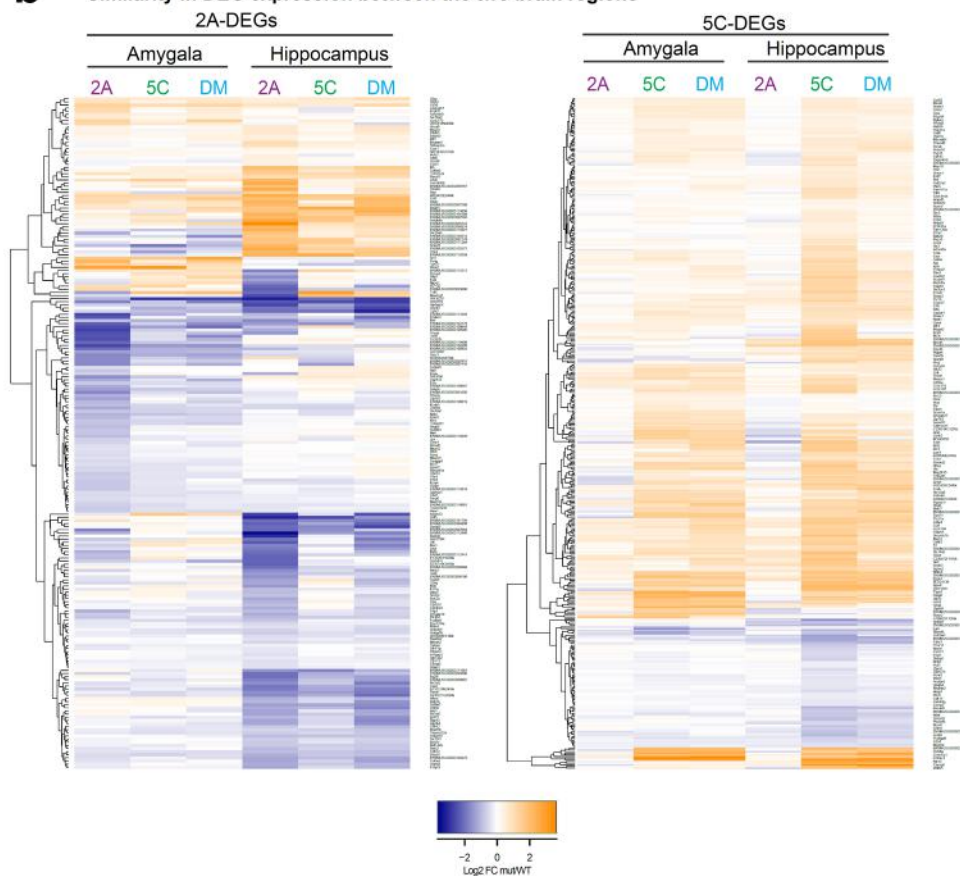

**Supplementary Figure 7. Similarity of gene misregulation between the amygdala and hippocampus.** (A) Overlap of single mutant DEGs between the amygdala (AMY) and hippocampus (HIP). 5C-DEGs overlap between the two brain regions. (B) Heatmap representation of log<sub>2</sub> fold changes of 2A-DEGs (left) and 5C-DEGs (right). Overall the patterns of gene misregulation are similar in the two brain regions.

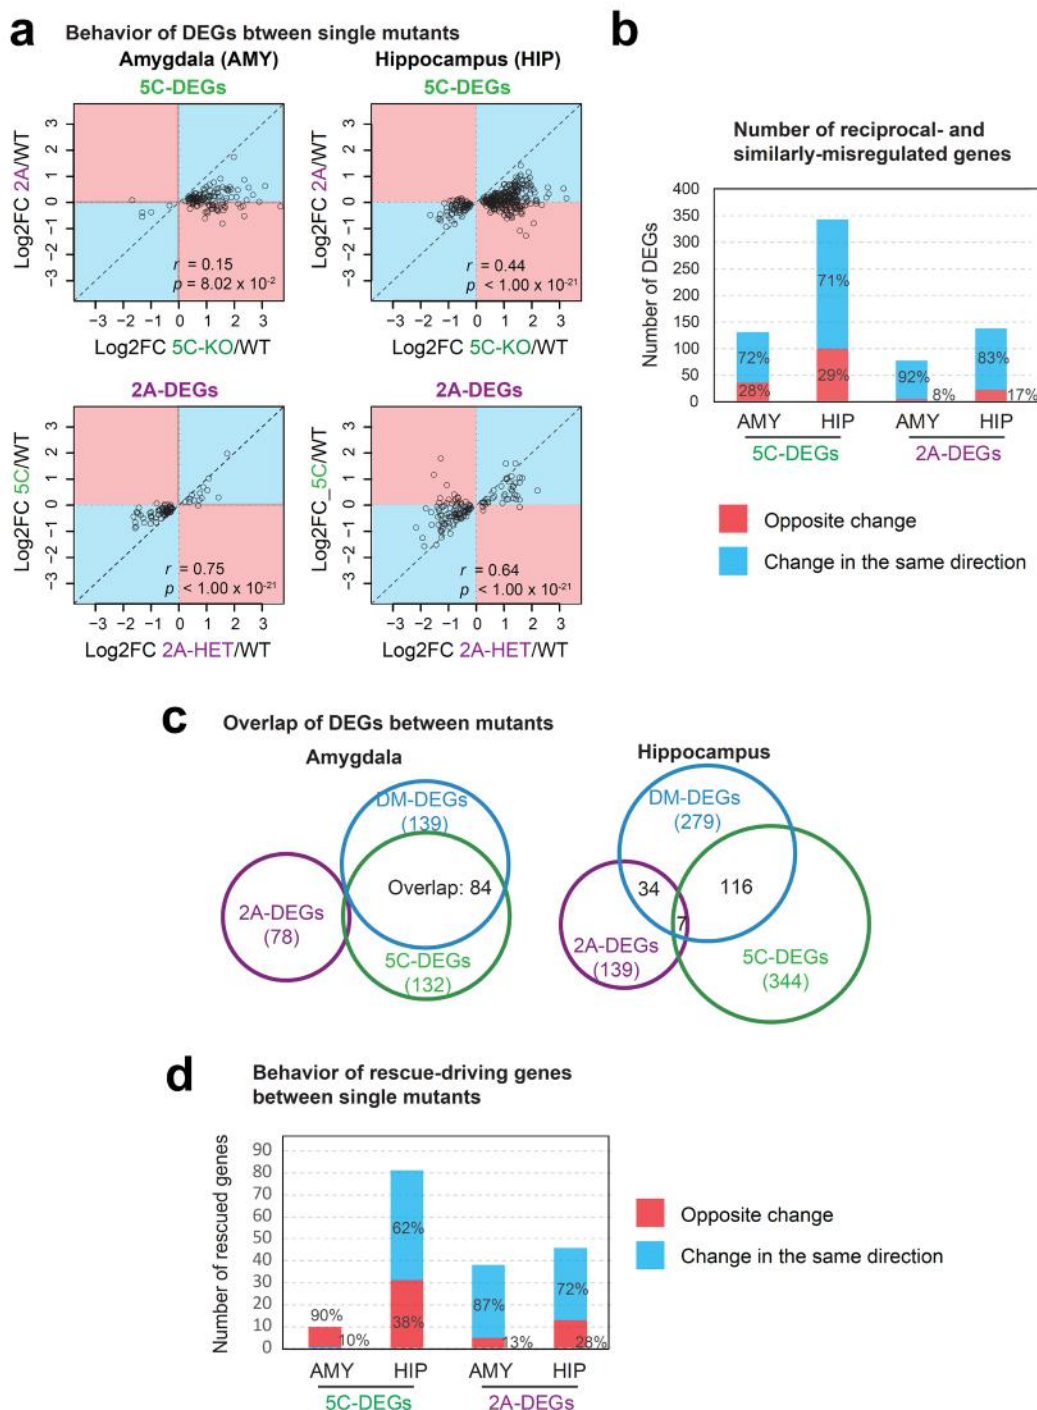

**Supplementary Figure 8. Direction of gene misregulation between *Kmt2a*-HET and *Kdm5c*-KO and their overlap in DM brain tissues. (A) Behavior of single-mutant DEGs in the other single mutant. Log<sub>2</sub> fold changes of DEGs found in a single mutant were plotted as a function of log<sub>2</sub> fold changes in the other single mutant. Red shade covers genes that are regulated in the opposite direction between *Kmt2a*-HET and *Kdm5c*-KO brain tissues. Blue shade covers deregulated genes in the same direction. (B) The larger number of genes is dysregulated in the same direction between the two single mutants. (C) Overlap of DEGs between mutants. 5C- and DM-DEGs overlap substantially.**

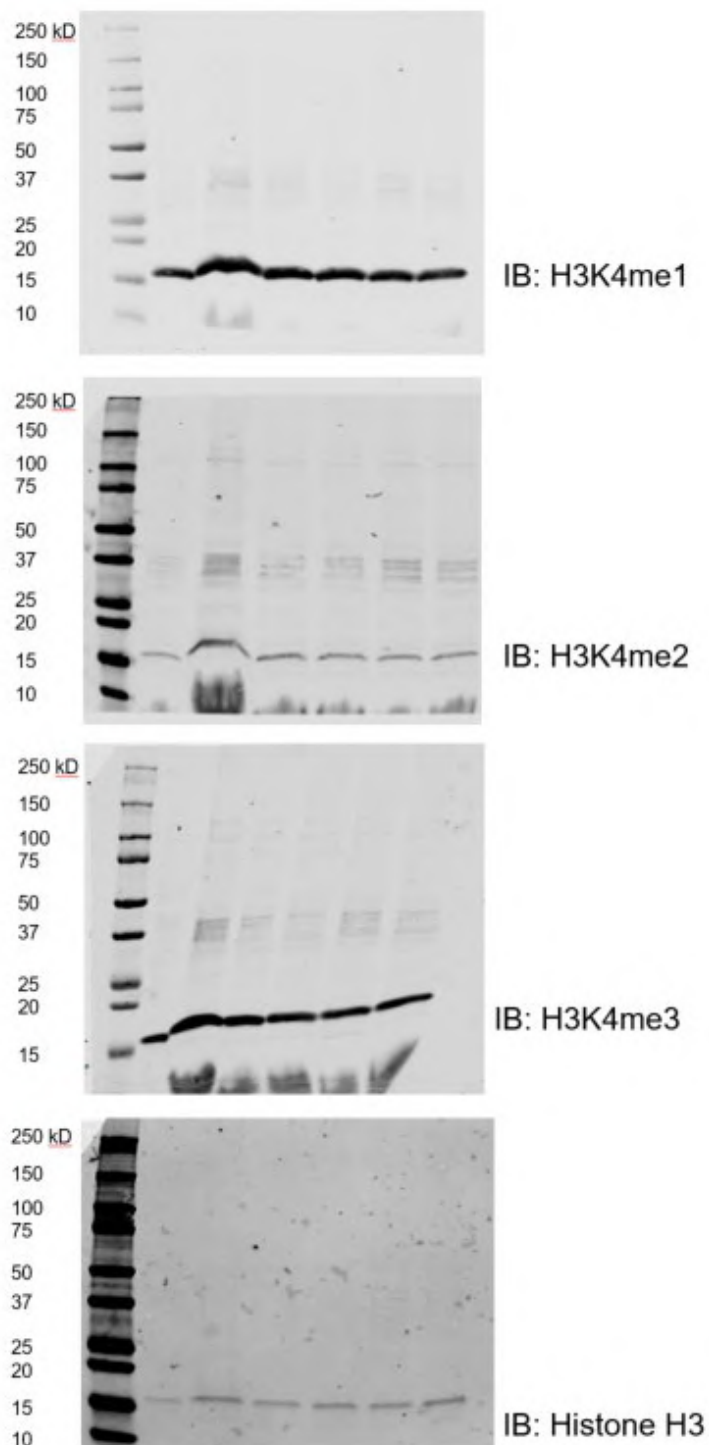

**Supplementary Figure 9. Full blots of immunoblot (IB) analyses shown in Figure 6a.**

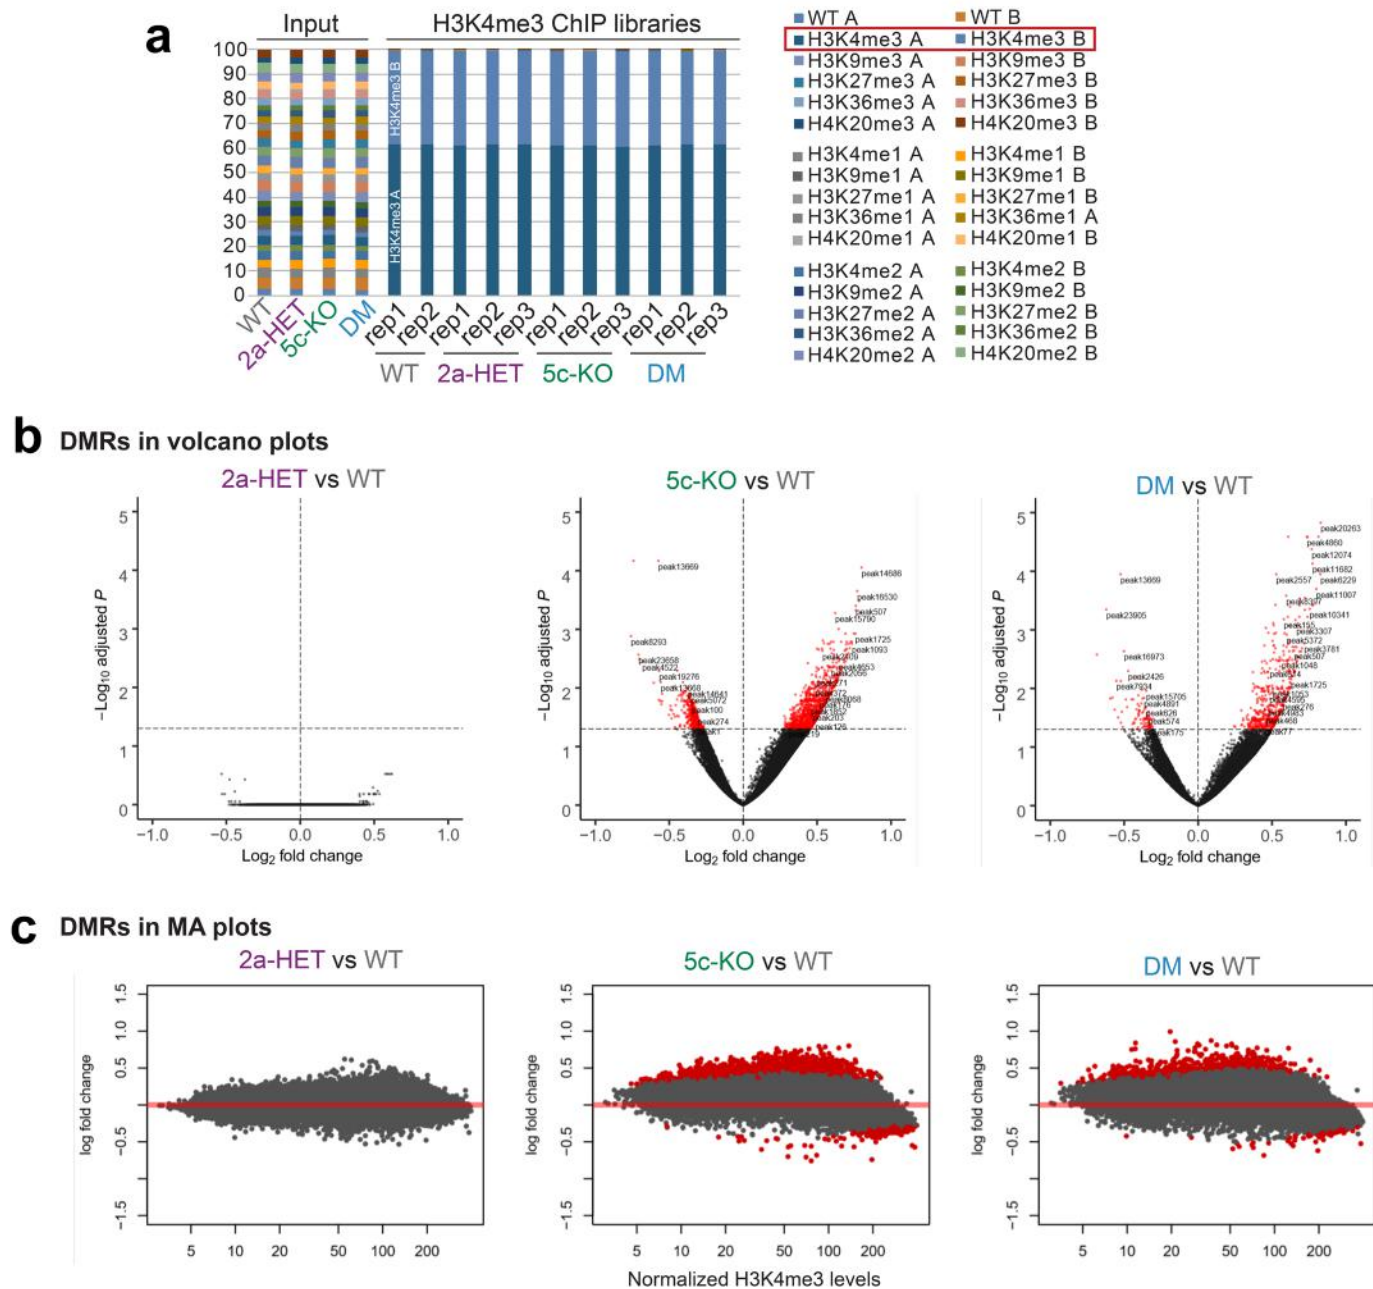

**Supplementary Figure 10. Basic characterization of H3K4me3 ChIP-seq data. (A)** Validation of H3K4me3 ChIP-seq specificity. Barcode reads originating from spike-in nucleosomes were counted. The two synthetic nucleosomes with the H3K4me3 barcodes dominated all ChIP samples, with H3K4me1/2 nucleosomes rarely detected. **(B)** Volcano plot represents the statistical significance of differentially methylated regions (DMRs). **(C)** MA plots of DMRs revealed signal intensity-dependent misregulation of H3K4me3 in *Kdm5c*-KO, where hypomethylated regions in the mutant were highly methylated in WT.

**a** Behavior of 2A- and 5C-DMRs in DM without DM-rep2

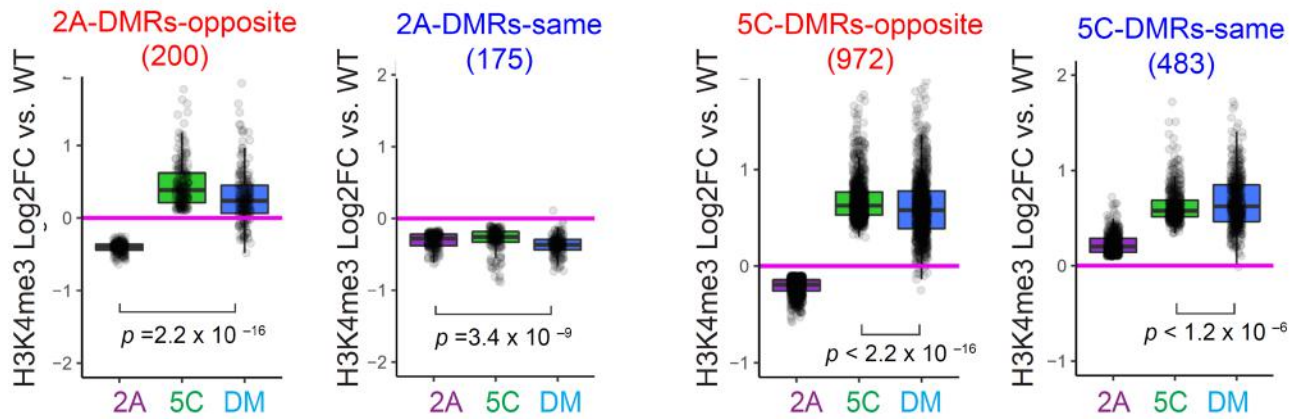

**Supplementary Figure 11. Rescue effect without DM rep2. (A)** DM rep2 showed strong rescue effect (Figure 6B). To test if H3K4me3 misregulations were alleviated in other DM replicates, we removed DM rep2 and then examined the behavior of single-mutant DMRs in DM. Log2 fold change of DMRs relative to WT were plotted across the three mutants. Boxplot features: box, interquartile range (IQR); bold line, median; gray dots, individual genes. Associated  $p$  values result from Wilcoxon signed-rank tests. Rescue effects were still evident in DM and also dependent on the direction of misregulation between the single mutants.



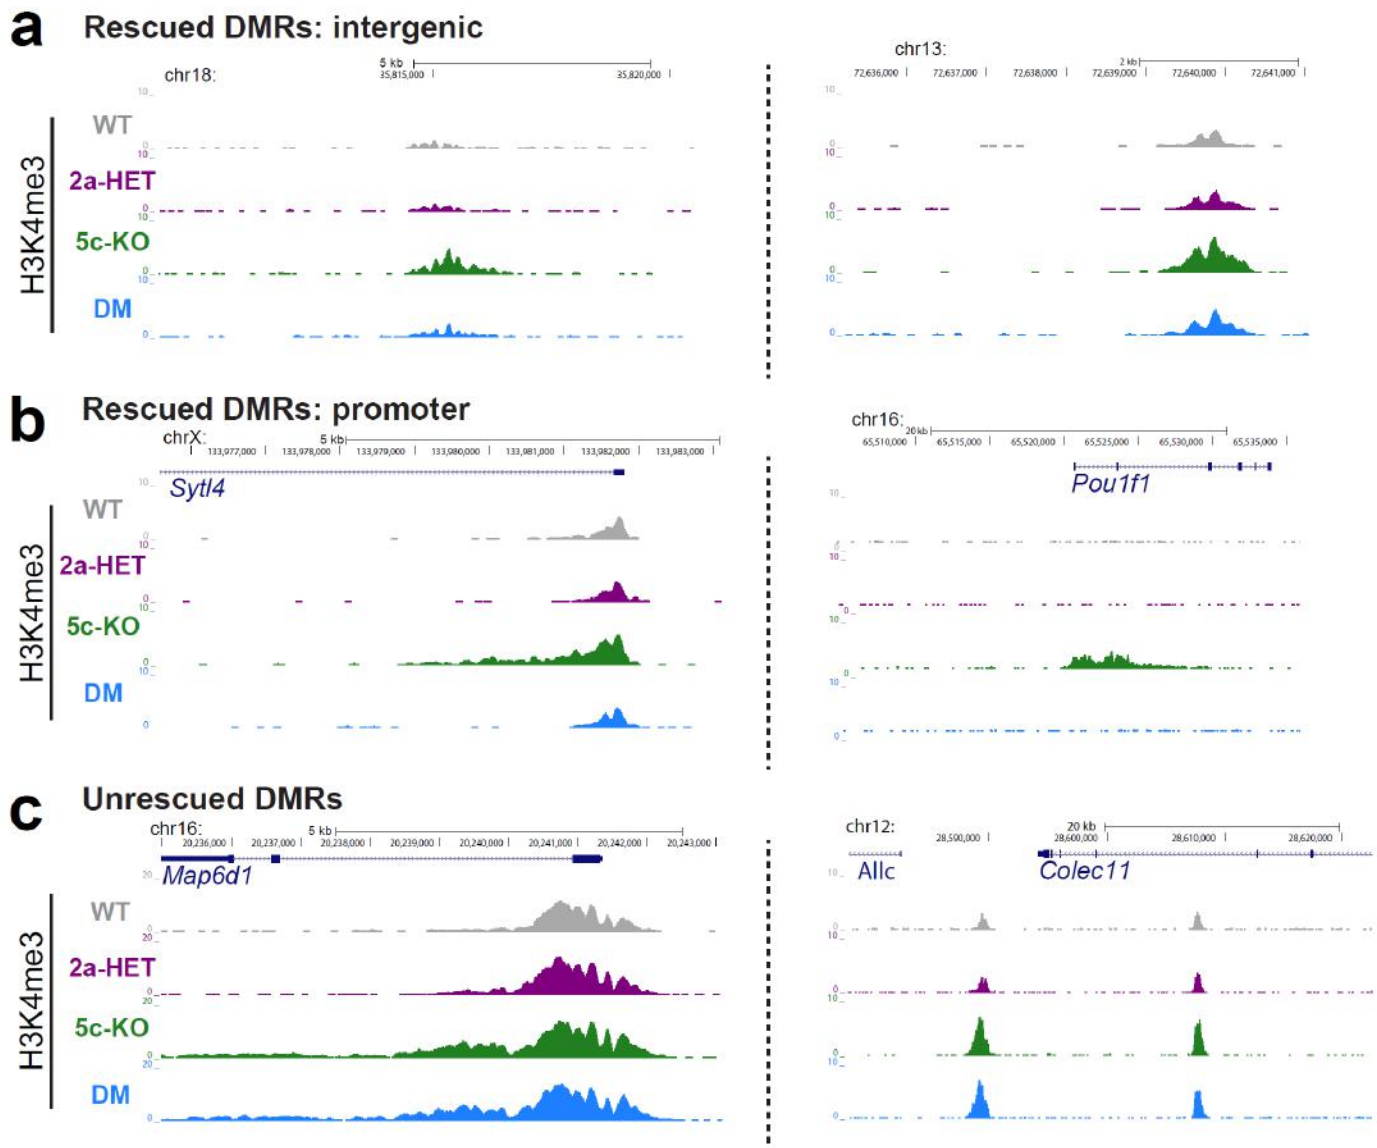

**Supplementary Figure 12. Representative loci found in the H3K4me3 ChIP-seq analysis. (A)** Representative genome browser view of two representative loci for each of the major genome areas: rescued intergenic DMRs (A), rescued promoter DMRs (B), un-rescued DMRs (C). Represented H3K4me3 patterns are averaged signals of replicates that are normalized to read depth and spike-in nucleosome signals.

## References

1. Tasic B, Menon V, Nguyen TN, Kim TK, Jarsky T, Yao Z, et al. Adult mouse cortical cell taxonomy revealed by single cell transcriptomics. *Nat Neurosci*. 2016;19(2):335-46.
2. Lein ES, Hawrylycz MJ, Ao N, Ayres M, Bensinger A, Bernard A, et al. Genome-wide atlas of gene expression in the adult mouse brain. *Nature*. 2007;445(7124):168-76.
3. Kang HJ, Kawasawa YI, Cheng F, Zhu Y, Xu X, Li M, et al. Spatio-temporal transcriptome of the human brain. *Nature*. 2011;478(7370):483-9.
4. Pletikos M, Sousa AM, Sedmak G, Meyer KA, Zhu Y, Cheng F, et al. Temporal specification and bilaterality of human neocortical topographic gene expression. *Neuron*. 2014;81(2):321-32.
5. Arbeitman MN. Maternal Experience Leads to Lasting Gene Expression Changes in Some Regions of the Mouse Brain. *G3 (Bethesda)*. 2019;9(8):2623-8.
